# Supplementary material for: Whole-genome sequencing of liver cancers identifies etiological influences on mutation patterns and recurrent mutations in chromatin regulators
Source: Springer Nature journal article supplement (doi:10.1038/ng.2291), 2012-05-27
Supplement: 41588_2012_BFng2291_MOESM2_ESM.pdf [file 41588_2012_BFng2291_MOESM2_ESM.pdf]

## Supplementary Information

### **Whole Genome Sequencing of Liver Cancers Identifies Etiological Influences on Mutation Patterns and Recurrent Mutations in Chromatin Regulators**

Akihiro Fujimoto\*, Yasushi Totoki\*, Tetsuo Abe, Keith A Boroevich, Fumie Hosoda, Ha Hai Nguyen, Masayuki Aoki, Naoya Hoshono, Michiaki Kubo, Fuyuki Miya, Yasuhito Arai, Hiroyuki Takahashi, Takuya Shirakihara, Masao Nagasaki, Tetsuo Shibuya, Kaoru Nakano, Kumiko Watanabe-Makino, Hiroko Tanaka, Hiromi Nakamura, Jun Kusuda, Hidenori Ojima, Kazuaki Shimada, Takuji Okusaka, Masaki Ueno, Yoshinobu Shigekawa, Yoshiiku Kawakami, Koji Arihiro, Hideki Ohdan, Kunihito Gotoh, Osamu Ishikawa, Shunichi Ariizumi, Masakazu Yamamoto, Terumasa Yamada, Kazuaki Chayama, Tomoo Kosuge, Hiroki Yamaue, Naoyuki Kamatani, Satoru Miyano, Hitoshi Nakagama, Yusuke Nakamura, Tatsuhiko Tsunoda, Tatsuhiro Shibata, and Hidewaki Nakagawa

\*These authors contributed equally to this work.

Correspondence should be addressed to Hidewaki Nakagawa (hidewaki@ims.u-tokyo.ac.jp) or Tatsuhiro Shibata (tashibat@ncc.go.jp).

## Supplementary Note

### Somatic point mutation and short indel calls

Read sequences were mapped by BWA<sup>1</sup> to the human reference genome (GRCh37). Possible PCR duplicated reads were removed by SAMtools<sup>2</sup> and an in-house program. After filtering by pair mapping distance, mapping uniqueness and orientation between paired reads, the mapping result files were converted into pileup format by SAMtools.

We used three kinds of read filters: set1; both read pairs were uniquely mapped with consistent orientation and pair distance (within average  $\pm 3$  s.d.), set2; at least one read pair was uniquely mapped with consistent orientation and pair distance and, set3; all uniquely mapped paired reads and set2, as described elsewhere<sup>3</sup>. Mutation calls were done using all three sets of filtered reads, and mutations identified in the all three sets were considered as candidates.

To identify point mutations, we used the following criteria; (1) non-reference calls with a frequency  $\geq 0.15$  after removing bases calls with base quality  $< 10$ , and mapping quality  $< 20$ , (2) supported by at least two base calls including one base call with base quality  $\geq 30$ , (3) a SAMtools consensus quality  $\geq 20$  and root mean square mapping quality  $\geq 40$ , (4) if three or more single nucleotide variants (SNVs) were found within any 10bp windows, or distance from nearest indel was less than 5bp, we discarded all SNVs. (5) if candidate non-coding SNVs were in a tandem repeat region suggested by tandem repeat finder<sup>4</sup>, we discarded the SNVs. (6) if candidate SNVs were in RepeatMasker repeat regions (<http://www.repeatmasker.org>) within 1Mb from the

centromeric or telomeric gaps, we discarded the SNVs. (7) if a base with consensus quality lower than 20 occurs within 3bp on either side of the target SNV, we discarded the SNVs. After SNV calling in the tumor samples, candidate SNVs were filtered based on the lymphocyte sequence of the same patient; (1) candidate SNV alleles with a frequency  $\geq 0.03$  after removing reads with base quality  $< 15$ , and mapping quality  $< 20$ , (2) depth of coverage in lymphocyte  $\leq 5$ , (3) depth of coverage in lymphocyte  $\leq 10$  and candidate SNV allele was represented in the dbSNP database v131 (<http://www.ncbi.nlm.nih.gov/projects/SNP/>).

Short indels were identified based on gaps in a read's alignment by BWA. We defined indels using the following criteria; (1) if indels were supported by a frequency  $\geq 0.1$  and  $\geq 4$  reads after removing reads with mapping quality  $< 20$ , and root mean square mapping quality  $\geq 40$ , (2) if candidate non-coding indels were in repeat regions suggested by tandem repeat finder or RepeatMasker, we discarded the indels. After indel calling in tumor samples, the candidates were filtered based on the lymphocyte sequence of the same patient using the following criteria; (1) depth of coverage in lymphocyte  $\leq 7$ , (2) for coding and non-coding region, if any indels were identified within 5bp or 10bp region in lymphocyte, respectively, the candidate indel was discarded. Gene information was based on UCSC<sup>5</sup> annotation.

The proportion of mutant alleles was estimated by the number of mutant and reference base calls. The mutation caller showed a false positive rate  $\leq 0.05$  in point mutations and  $\leq 0.1$  in short indels.

### **Estimation of false positive and false negative rates in somatic mutation calling**

To examine accuracy of our analysis pipeline, we performed Sanger sequence validation for randomly selected point mutation and indel candidates. The false positive rate was 0/124 in coding point mutations, 2/44 (4.5%; 95% CI 0.6-15.5%) in non-coding point mutations, 1/16 (6.3%; 95% CI 0.16-30.2%) in coding indels and 3/32 (9.3%; 95% CI 0.20-25.0%) in non-coding indels. Note that false positive rates in repeat regions may be higher than these values because mutations in repeat regions were difficult to examine by PCR-Sanger sequencing method.

False negative rate (FNR) is very important, but difficult to estimate in the cancer genome sequence, because it is difficult to obtain sufficient number of already identified somatic mutations. Therefore, we used SNP array genotype for FNR estimation. We genotyped one cancer (HB6 tumor) and lymphocyte sample from another patient (HB5 lymphocyte) with Illumina OmniExpress array, and then ran our analysis pipeline by using HB6 tumor and HB5 lymphocyte data. We compared the results from our analysis pipeline with these from genotyping arrays. If our analysis pipeline did not call HB6 tumor-specific SNP alleles, i.e. heterozygous in HB6 tumor and homozygous in HB5 lymphocyte, we considered that SNP to be a false negative in our pipeline. By the comparison of HB6 tumor data and HB5 lymphocyte data, we identified 61,077 SNPs that were homozygous with reference allele on GRCh37 in HB5 lymphocyte and heterozygous in HB6 tumor by the genotyping array. Of these, 56,074 were identified by WGS data analysis, therefore FNR was estimated to be 8.2% (95% C.I. 8.0-8.4%). Four-fifth of false negatives (6.5%) were caused by insufficient depth of

coverage in HB5 lymphocyte.

### **Identification of common mutation in MCTs**

We compared somatic mutation sites and mutation patterns of the two pairs of MC tumors (HC3 and HC7). In protein-coding regions, no common point somatic mutation was identified. Three genes, *ATM*, *FSIP2*, and *LRFN5*, were mutated in both the HC3-1 and HC3-2 tumors, but the mutations occurred at different positions. In non-coding regions, WGS identified 30 and 37 common somatic point mutations and indels in the HC3 and HC7 MCT HCC genomes, respectively. However, most of these occurred in repetitive regions and all candidates that could be sequenced by Sanger sequencing method (n=20) were found to be germline variants. This high false positive rate is due to the use of a common lymphocyte sample as a control. False negatives of germline variants from the lymphocyte sample could cause common false positive somatic mutations in both tumors. There was also no common structural alteration found in these MCT HCC genomes. These findings strongly suggest that these synchronous MCT tumors developed through an accumulation of a completely different set of genetic alterations.

### **Permutation test on the distance between MCTs**

To evaluate the distance between the paired MCTs, we performed permutation tests based on the PCA (**Fig. 2c and 2d**). We randomly selected two sets of tumors from the 25 tumors and calculated the three-dimensional distance between tumors in a set. Then

the average distance of two sets was calculated. We repeated this process 100,000 times to obtain the null distribution. The average distance of the MC pair was tested under this null distribution.

### **Association between mutations in chromatin regulators and clinical factors**

We examined the association of chromatin regulator mutations with several clinical factors. Tests of significance for tumor size, Edmondson grade, and liver fibrosis were performed by the Pearson's correlation test. Tests for portal vein invasion and hepatic vein invasion were carried out by the Fisher's exact test. We found that the stage of liver fibrosis in the background liver was associated with mutations and CNAs of the chromatin regulator genes ( $P$ -value = 0.026) or ARID family genes ( $P$ -value = 0.0086) (**Supplementary Table 11**). We also found that the presence of invasion to hepatic vein in tumors was associated with mutations and CNAs of *ARID1A* ( $P$ -value = 0.042) (**Supplementary Table 11**). Although we did not observe any significant association after the Bonferroni correction, mutations of the chromatin regulators in HCC may contribute to poor prognosis of HCC patients.

### **Copy number alternation (CNA)**

To investigate copy number alterations, we analyzed the ratio of the depth of coverage across 5kb windows of the tumor sample to that of the matched lymphocytes. In total, we detected 294 deleted regions ( $\log_2R$  ratio  $\leq -1$ ) and 20 amplified regions ( $\log_2R$  ratio  $\geq 2$ ), of which 39 deletions and one amplification occurred recurrently. We also

observed 397 low-level losses ( $\log_2R$  ratio  $\leq -0.6$ ) and one low-level gain ( $\log_2R$  ratio  $\geq 1$ ) with a frequency greater than 15% ( $n \geq 5$ ), most of which have been reported previously<sup>6,7</sup> (**Supplementary Table 3**). Among the significantly mutated genes (**Table 1, Supplementary Table 7**), *TP53* harbored both a missense point mutation and low-level loss in five tumors, while HC6 had a 1bp-deletion in the coding region and low-level loss of *ARID1A*. Additionally, we identified several deletions or low-level losses of the chromatin regulators; *ARID1A* in 5 tumors, *MLL* in 4 tumors, *ARID1B* in one tumor and *MLL3* in one tumor (**Fig. 4a**).

### Genomic rearrangement

Using inconsistently-mapped reads, we detected an average of 20.8 genomic rearrangements per tumor with a wide range among samples (0-59) (**Supplementary Table 2**). Among the 561 PCR-validated rearrangements (**Supplementary Table 2, Supplementary Fig. 11**), breakpoints of 351 rearrangements were in intragenic regions and 30 rearrangements involved possible gene fusion events. Thirteen genes (*ACVR2A*, *AUTS2*, *CADPS2*, *EPAS1*, *FHIT*, *MBD5*, *NR3C1*, *PLAG1*, *PLEKHG3*, *RAD51L1*, *RBFOX3*, *STK39* and *XRCC4*) had rearrangement breakpoints in multiple HCCs. Seventy genes had both protein-altering point mutations and a rearrangement. Fifteen genes found to have rearrangement breakpoints also contained recurrent protein-altering point mutations (**Supplementary Tables 4 and 7**), including *CSMD1*, the chromatin regulator *ARID2* and two significantly mutated genes, *ALB* and *ATM*. We did not observe any recurrent genomic rearrangements that generated an

in-frame fusion gene in this cohort. There is no apparent difference of the observed genomic structure changes between HBV- and HCV-related HCCs (**Supplementary Fig. 2**), and there is no common rearrangement in the two sets of the MCTs (HC3 pair and HC7 pair) (**Fig. 2a**).

### **Recurrent somatic mutations in non-coding regions**

We tested the number of mutations in the 5'UTR, 3'UTR, promoter regions (1kb region from transcription start sites) and non-coding RNA regions while considering the regional differences of the mutation rate and region lengths. As a result, 74 regions were identified with  $\geq 3$  point mutations or indels. Of these, 63 were considered significant after adjustment for multiple testing ( $q$ -value  $\leq 0.05$ ), which included regulatory regions of coding genes as well as multiple small and long intergenic non-coding RNAs (**Fig 2a, Supplementary Table 12**). Among them, *PHF1*, which is involved in DNA damage response and epigenetic modification and reported to be rearranged in rare uterine sarcomas<sup>8</sup>, was significantly mutated in the promoter region as well as the protein-coding regions. Additionally, *MED1*, which is reported to play an important role in liver regeneration and liver carcinogenesis in animal models<sup>9</sup>, was also significantly mutated in the 3'UTR as well as its protein-coding region.

### **References**

1. Li, H. & Durbin, R. Fast and accurate short read alignment with Burrows-Wheeler transform. *Bioinformatics* **25**, 1754-60 (2009).
2. Li, H. et al. The Sequence Alignment/Map format and SAMtools.



- Bioinformatics* **25**, 2078-9 (2009).
3. Totoki, Y. et al. High-resolution characterization of a hepatocellular carcinoma genome. *Nat Genet* **43**, 464-9 (2011).
  4. Benson, G. Tandem repeats finder: a program to analyze DNA sequences. *Nucleic Acids Res* **27**, 573-80 (1999).
  5. Fujita, P.A. et al. The UCSC Genome Browser database: update 2011. *Nucleic Acids Res* **39**, D876-82.
  6. Laurent-Puig, P. & Zucman-Rossi, J. Genetics of hepatocellular tumors. *Oncogene* **25**, 3778-86 (2006).
  7. Tsai, W.L. & Chung, R.T. Viral hepatocarcinogenesis. *Oncogene* **29**, 2309-24 (2010).
  8. Micci, F., Panagopoulos, I., Bjerkehagen, B. & Heim, S. Consistent rearrangement of chromosomal band 6p21 with generation of fusion genes JAZF1/PHF1 and EPC1/PHF1 in endometrial stromal sarcoma. *Cancer Res* **66**, 107-12 (2006).
  9. Matsumoto, K. et al. Critical role for transcription coactivator peroxisome proliferator-activated receptor (PPAR)-binding protein/TRAP220 in liver regeneration and PPARalpha ligand-induced liver tumor development. *J Biol Chem* **282**, 17053-60 (2007).

## Supplementary Figures Contents

**Supplementary Figure 1:** Average depth of coverage with uniquely mapped reads in each WGS sample.

**Supplementary Figure 2:** Difference in mutation counts between HBV- and HCV-related tumors.

**Supplementary Figure 3:** Somatic substitution pattern of each tumor.

**Supplementary Figure 4:** The number of somatic substitutions on the transcribed strand and the untranscribed strand.

**Supplementary Figure 5:** The repair on the transcribed strand.

**Supplementary Figure 6:** PCA of somatic substitution patterns.

**Supplementary Figure 7:** Reduction of the target gene expression by siRNA.

**Supplementary Figure 8:** Down-regulation of *ERRF1* and *ARID1B* genes did not affect proliferation of JHH5 cells which lack expression of these two genes.

**Supplementary Figure 9:** Integration sites on HBV genome.

**Supplementary Figure 10:** HBV genome integration sites into the *TERT* region.

**Supplementary Figure 11:** Graphical representation of 27 HCC genomes.

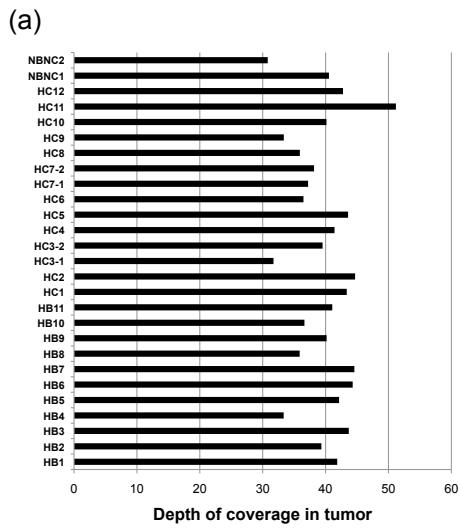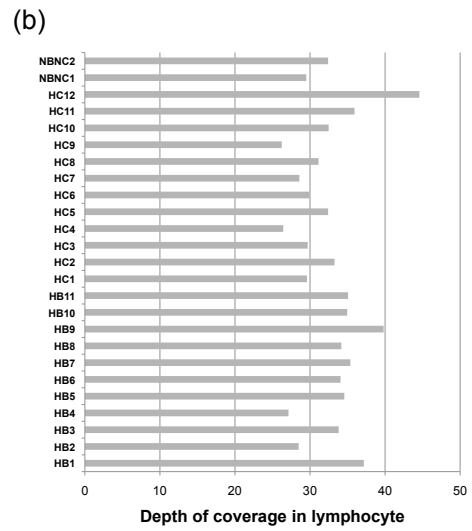

**Supplementary Figure 1:** Average depth of coverage with uniquely mapped reads in each sample. We calculated depth of coverage of each sample by using uniquely mapped reads after removing PCR-duplication.

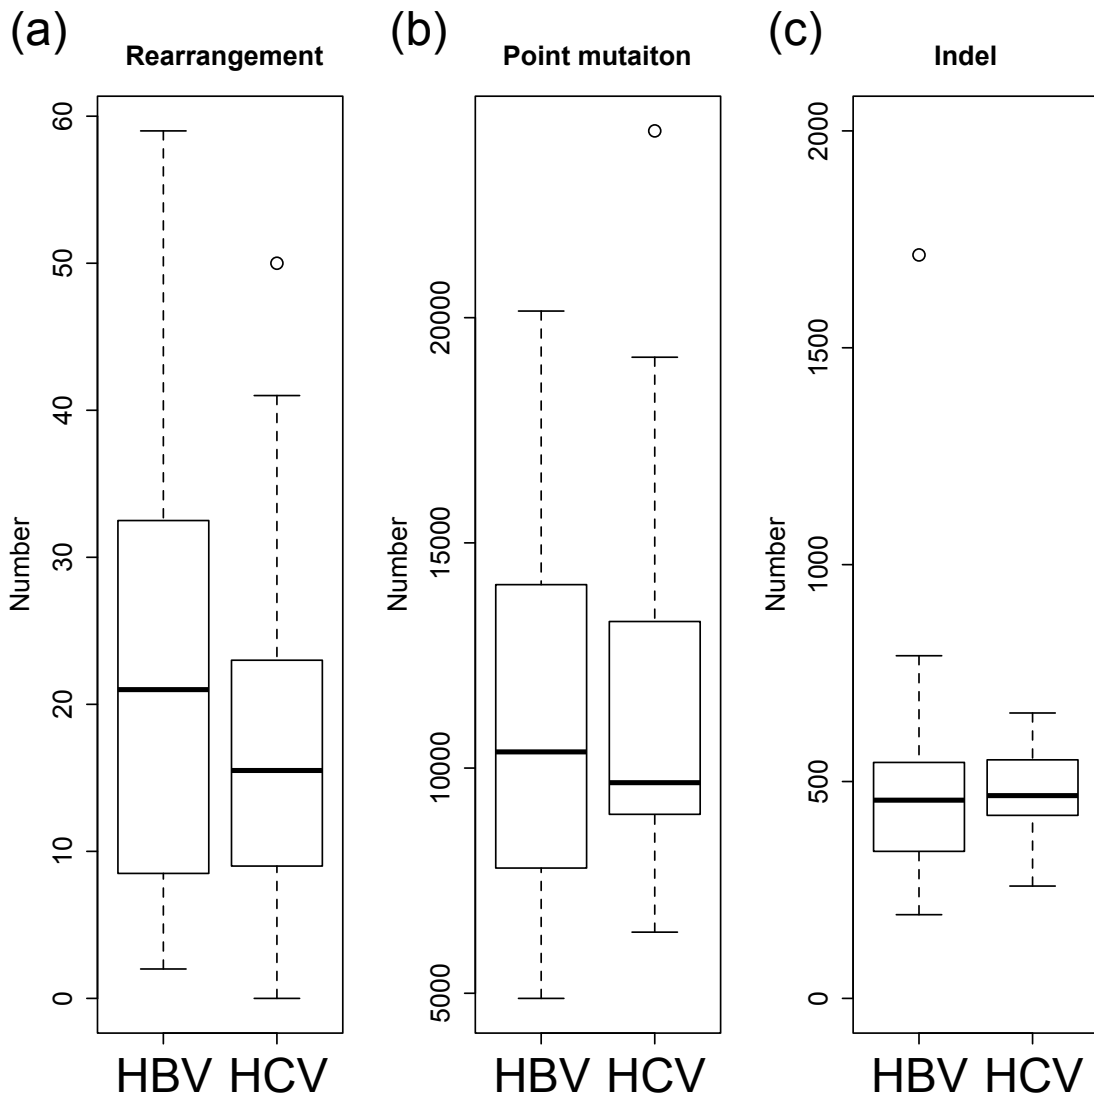

**Supplementary Figure 2:** Difference in mutation counts between HBV- and HCV-related tumors. (a) Number of rearrangements in HBV- and HCV-related tumors. (b) Number of point mutations in HBV- and HCV-related tumors. (c) Number of indels in HBV- and HCV-related tumors. No significant difference was observed in these comparisons.

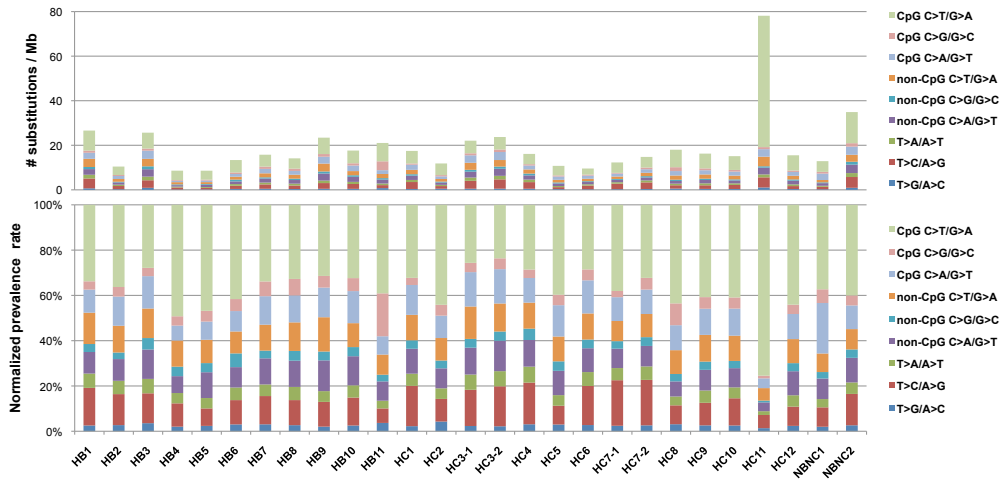

**Supplementary Figure 3:** Somatic substitution pattern of each tumor. (Top) Number of somatic substitutions in each of the nine classes per Mb in 27 HCC genomes. (Bottom) Frequency of the nine classes of somatic substitutions in 27 HCC genomes.

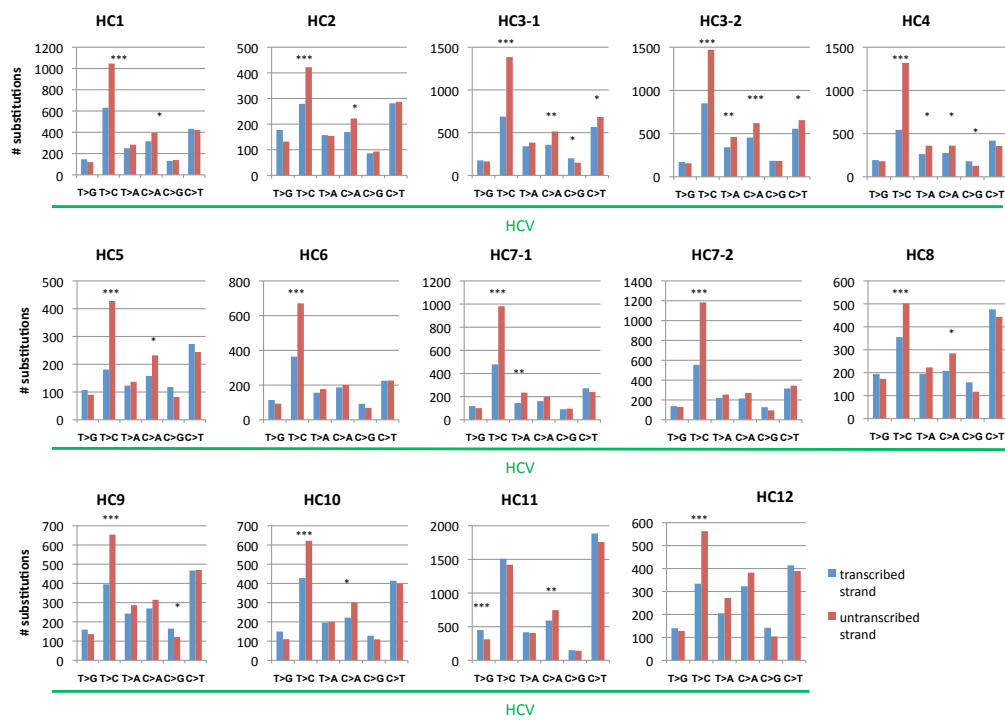

**Supplementary Figure 4:** The number of somatic substitutions on the transcribed strand and the untranscribed strand (**a**) in 14 HCV-related HCCs. \*\*\*;  $P$ -value <  $10^{-6}$ , \*\*;  $P$ -value < 0.0001, \*;  $P$ -value < 0.01.

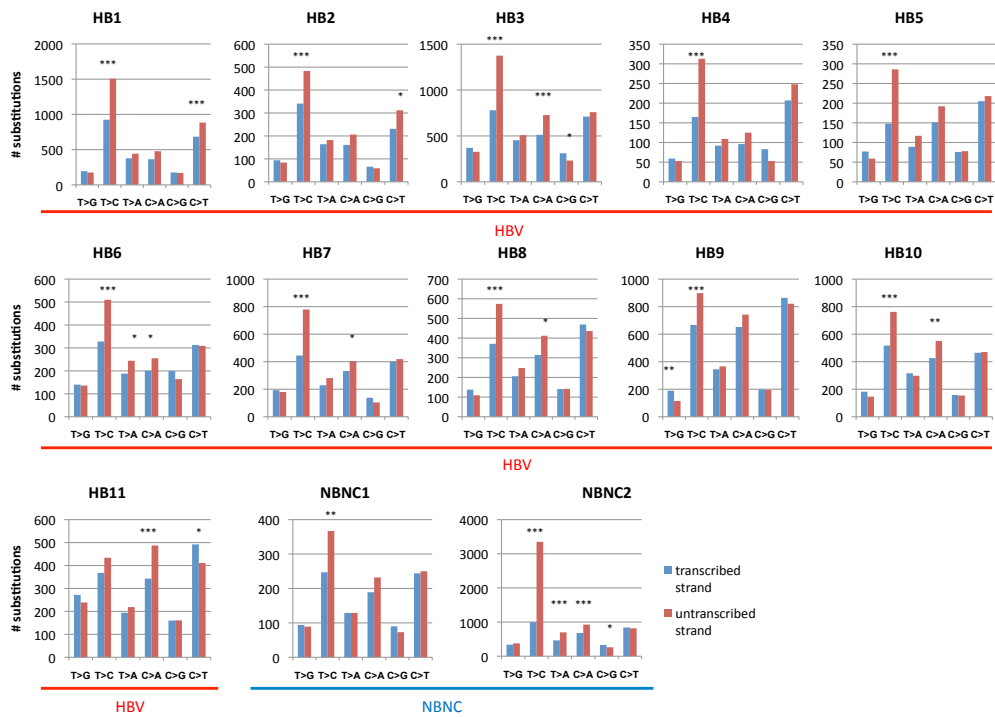

**Supplementary Figure 4:** The number of somatic substitutions on the transcribed strand and the untranscribed strand (**b**) in 11 HBV-related HCCs, and 2 HCCs without HBV and HCV infections (NBNC). \*\*\*,  $P$ -value <  $10^{-6}$ , \*\*,  $P$ -value < 0.0001, \*,  $P$ -value < 0.01.

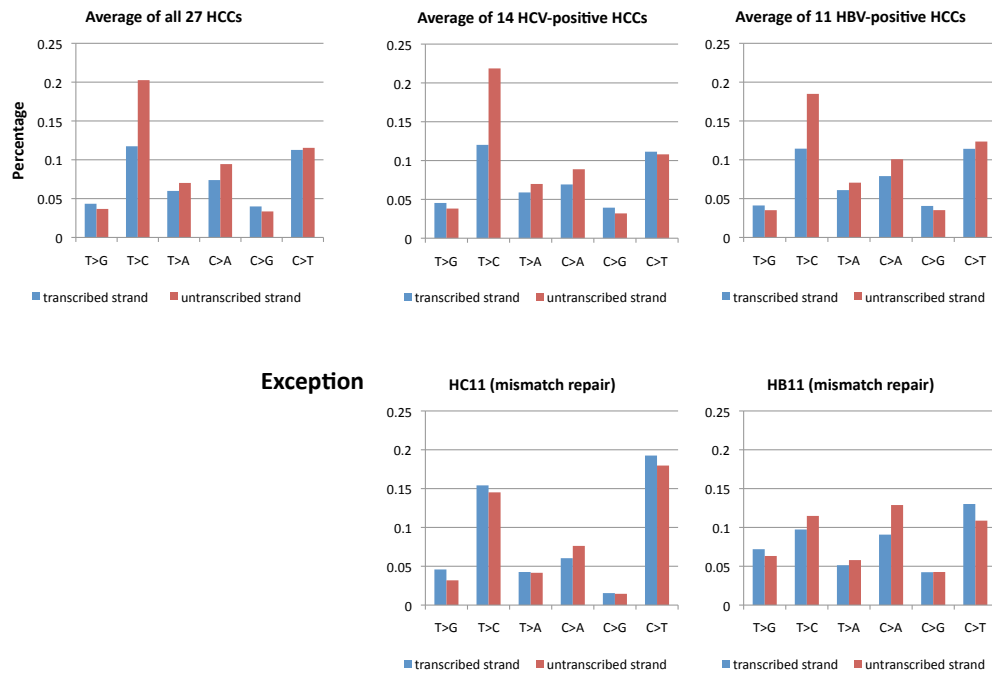

**Supplementary Figure 4:** The number of somatic substitutions on the transcribed strand and the untranscribed strand. **(c)** The average percentage of somatic substitutions in all 27 HCCs, 14 HCV-related HCCs and 11 HBV-related HCCs (top). Two exceptions (bottom). TCR did not occur in the mismatch-repair deficient tumor (HC11) with somatic nonsense mutation of *MLH1*. Another case (HB11) had a familial disposition to cancer and exhibited a distinct mutation signature (increased indels, suggesting mismatch-repair deficiency, less dominant T>C/A>G transitions, and a decreased effect of TCR at T>C transition).



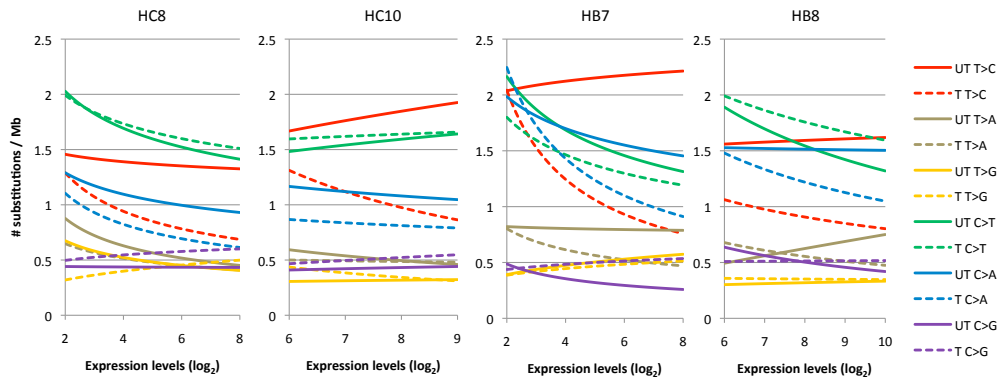

**Supplementary Figure 5:** Repair on the transcribed strand. Fitted curves showing the effect of gene expression and strand bias on substitution prevalence. We used Agilent microarray expression data (Whole Human Genome (8×60K) Oligonucleotide Microarray) in this TCR analysis and Expression level (log<sub>2</sub>) indicate Agilent microarray intensity level units with log<sub>2</sub> scale. UT, untranscribed strands; T, transcribed strands.

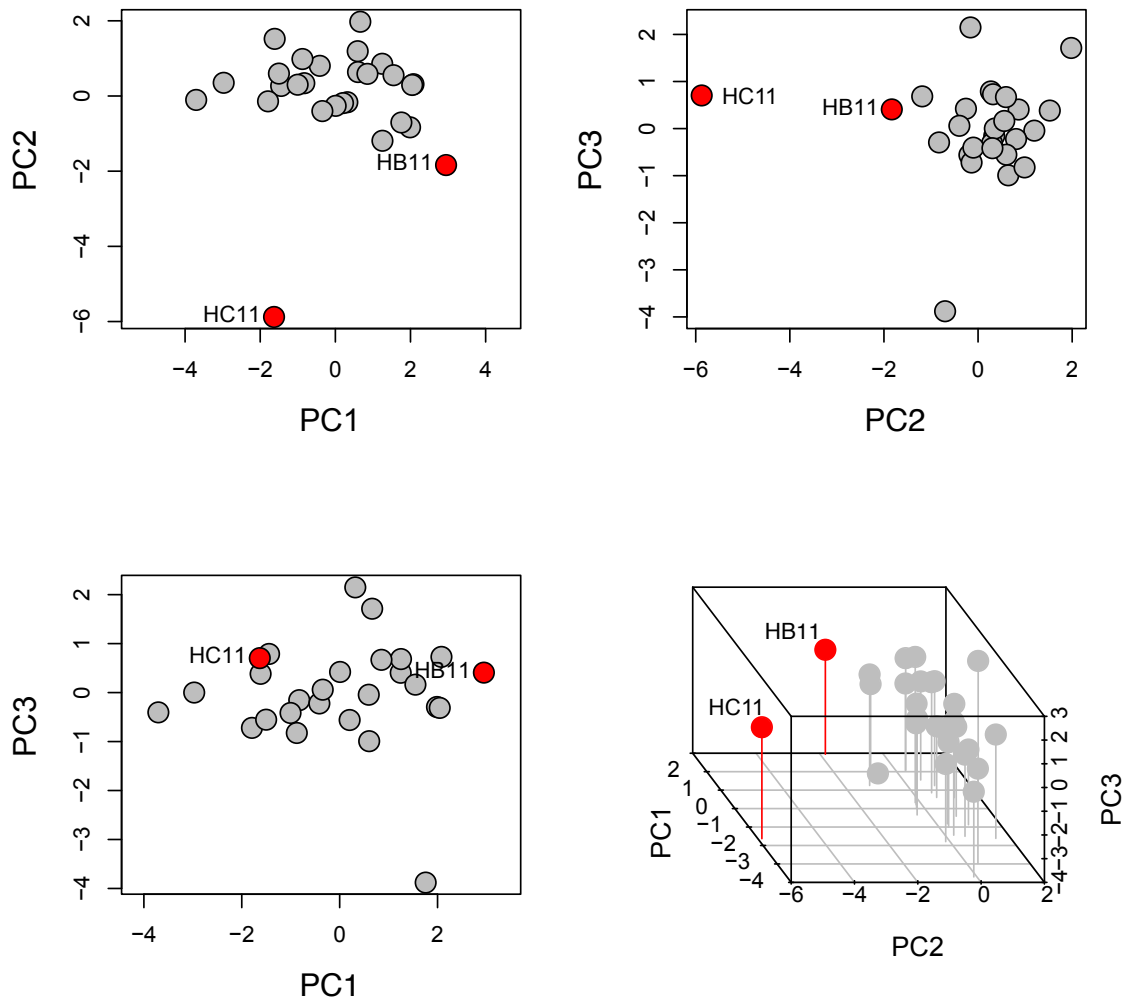

**Supplementary Figure 6: PCA of somatic substitution patterns. (a)** HB11 and HC11 are outliers, probably because they apparently show mismatch-repair deficient phenotype due to a somatic nonsense mutation (p.E234\*) of *MLH1* for HC11 and unknown factors for HB11

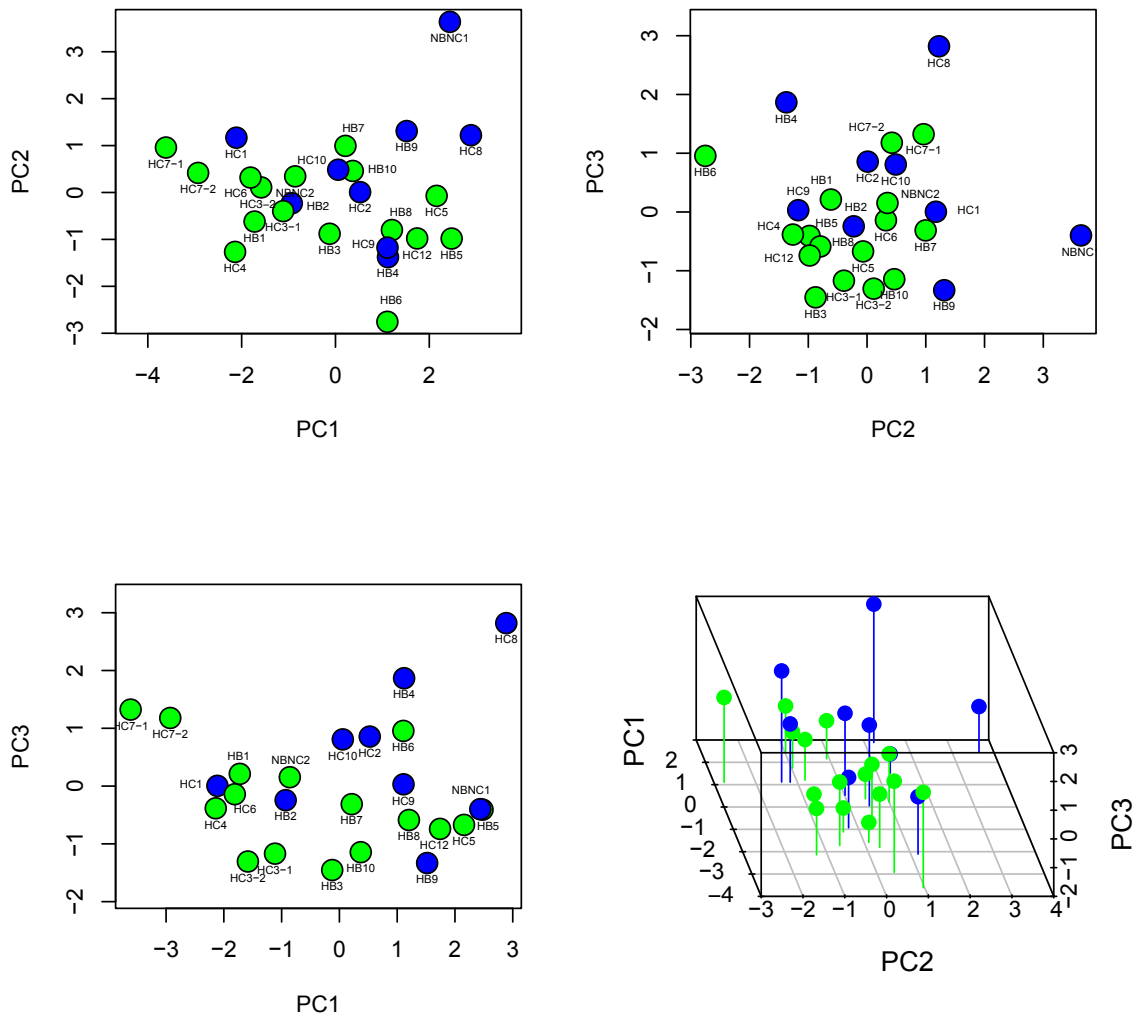

**Supplementary Figure 6:** PCA of somatic substitution patterns. **(b)** Comparison between tumors from habitual alcohol drinking (green) and non-drinking (blue) HCC patients. Habitual alcohol drinking was significantly correlated with somatic substitution patterns in HCCs ( $P$ -value = 0.028).

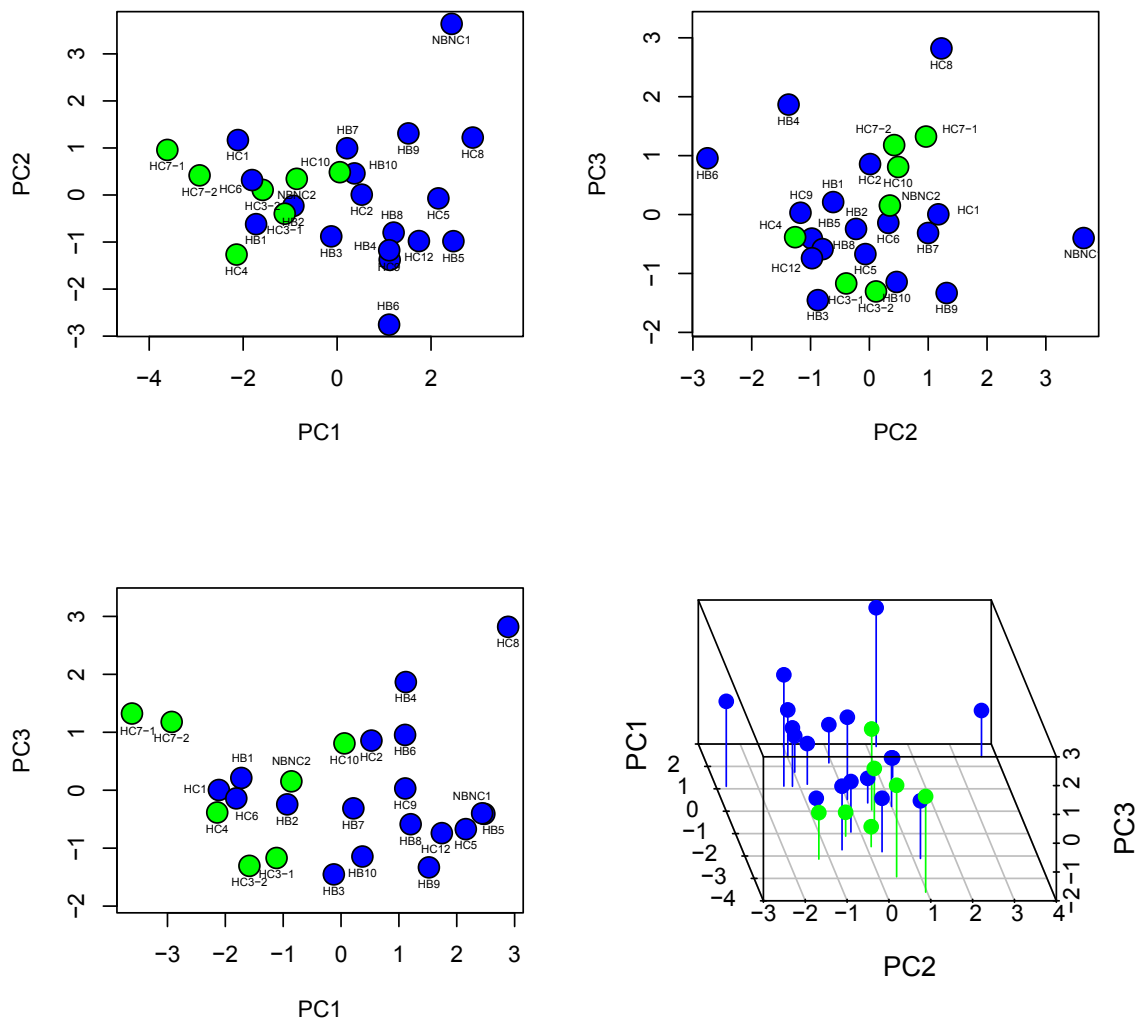

**Supplementary Figure 6:** PCA of somatic substitution patterns. **(c)** Comparison between synchronous/metachronous multiple liver nodules (green) and the other (blue) HCCs. The occurrence of synchronous or metachronous multiple HCCs, most of which are likely to be MC, was significantly correlated with somatic substitution patterns ( $P$ -value = 0.016)

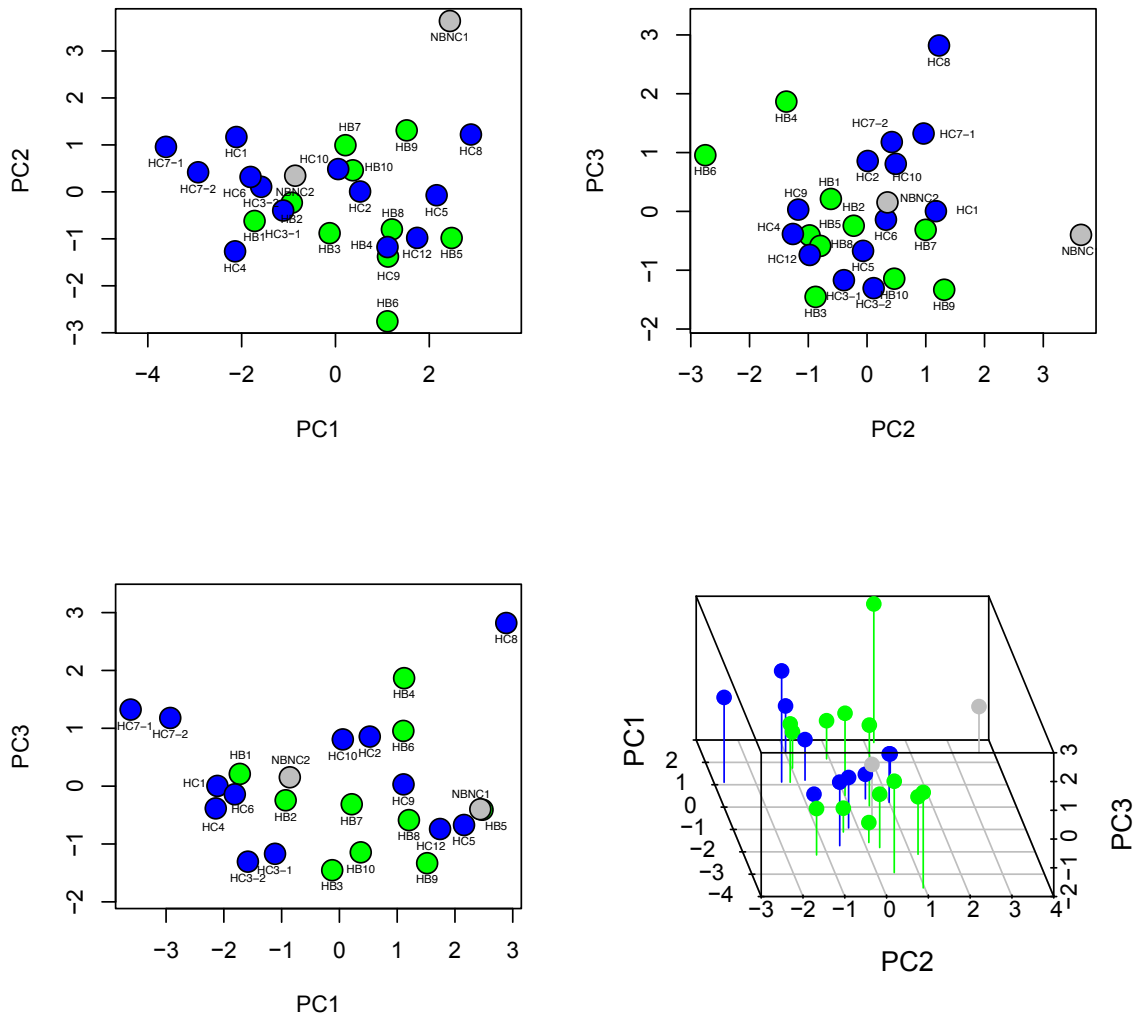

**Supplementary Figure 6:** PCA of somatic substitution patterns. **(d)** Comparison between HBV-related (green), HCV-related (blue), and NBNC (grey) HCCs. Different substitution patterns between the HBV-, HCV-related and NBNC HCCs were observed ( $P$ -value = 0.091, canonical correlation analysis, and  $P$ -value = 0.020, correlation analysis on the second component: PC2).

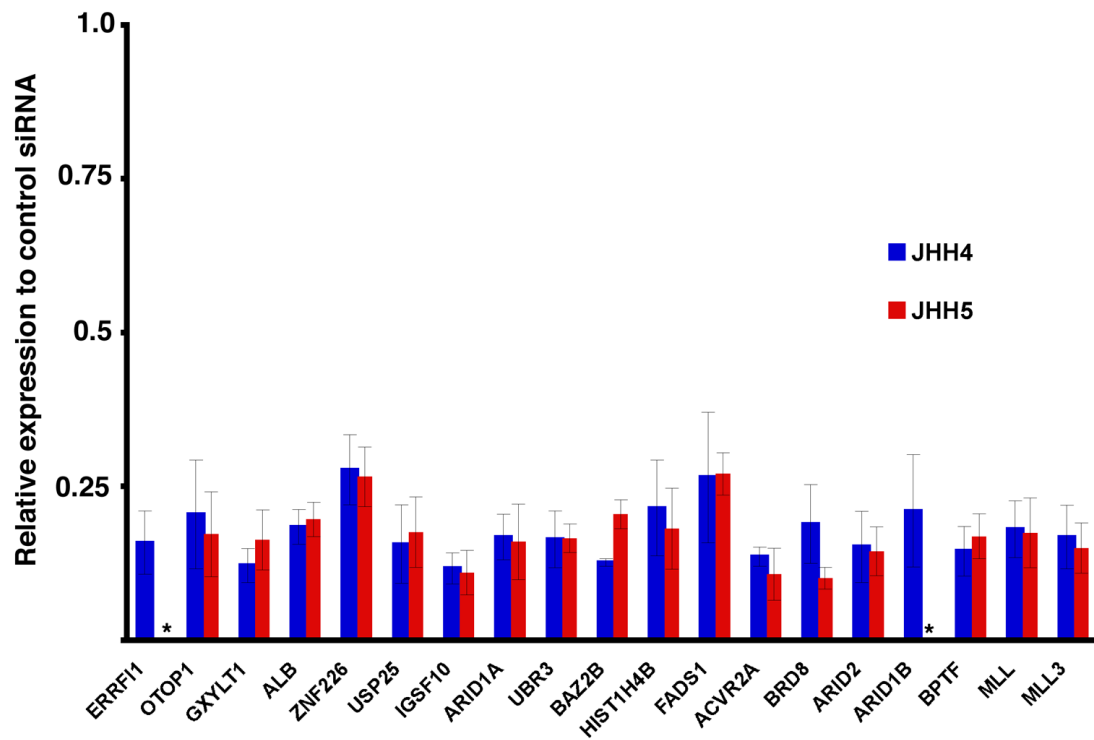

**Supplementary Figure 7:** Reduction of the target gene expression by siRNA. Relative expression of the target genes compared to the control siRNA treated cells was measured by quantitative RT-PCR. Asterisk shows the genes whose expression was not detected because of homozygous gene deletion (see **Supplementary Figure 8**). Data indicates mean +/- SD.

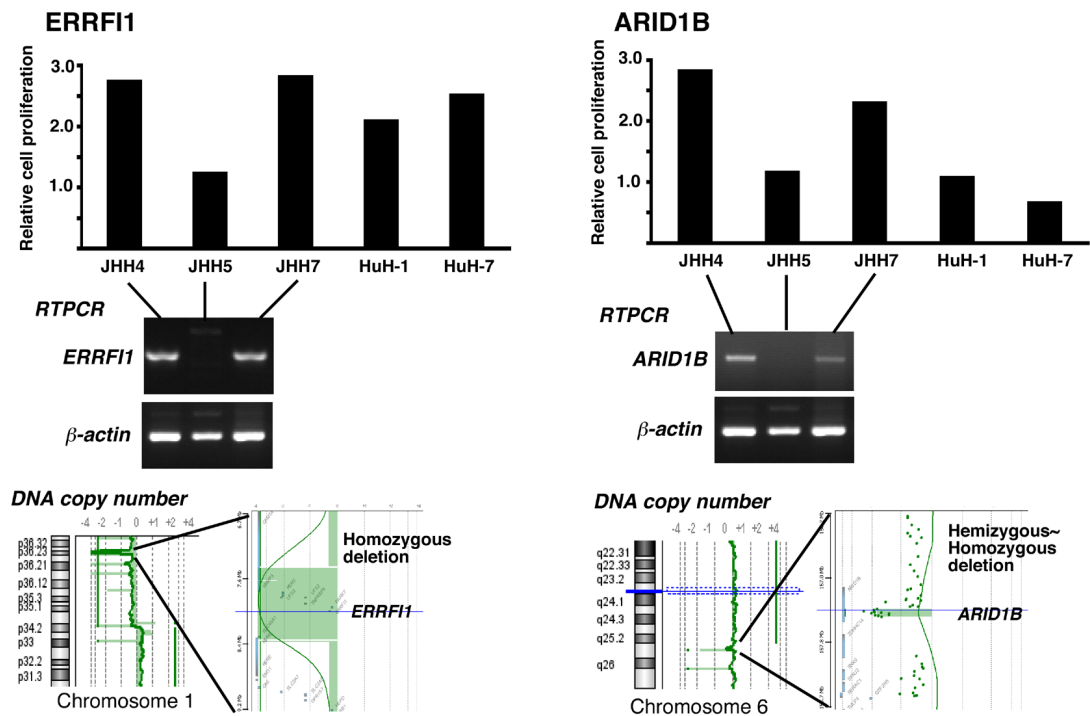

**Supplementary Figure 8:** Down-regulation of *ERRF1* and *ARID1B* genes did not affect proliferation of JHH5 cells which lack expression of these two genes. (Top) Relative cell proliferation of five HCC cell lines treated with siRNAs against *ERRF1* and *ARID1B* genes. Note that down-regulation of these genes did not affect proliferation of JHH5 cells. (Middle) RT-PCR analysis of *ERRF1*, *ARID1B* and  $\beta$ -Actin (control) genes in three HCC cell lines. *ERRF1* and *ARID1B* mRNAs were not detected in JHH5 cells. (Bottom) Array CGH analysis of *ERRF1* and *ARID1B* loci in JHH5 cells. A homozygous deletion including the whole *ERRF1* gene was detected on *1p36*. A hemizygous deletion with a minute homozygous deletion within the *ARID1B* gene was detected on *6q25*. A high-density oligonucleotide array containing 244,000 independent probes (Human Genomic Microarray 44B, Agilent Technologies) was used for array comparative genomic hybridization employing the manufacturer's protocol.

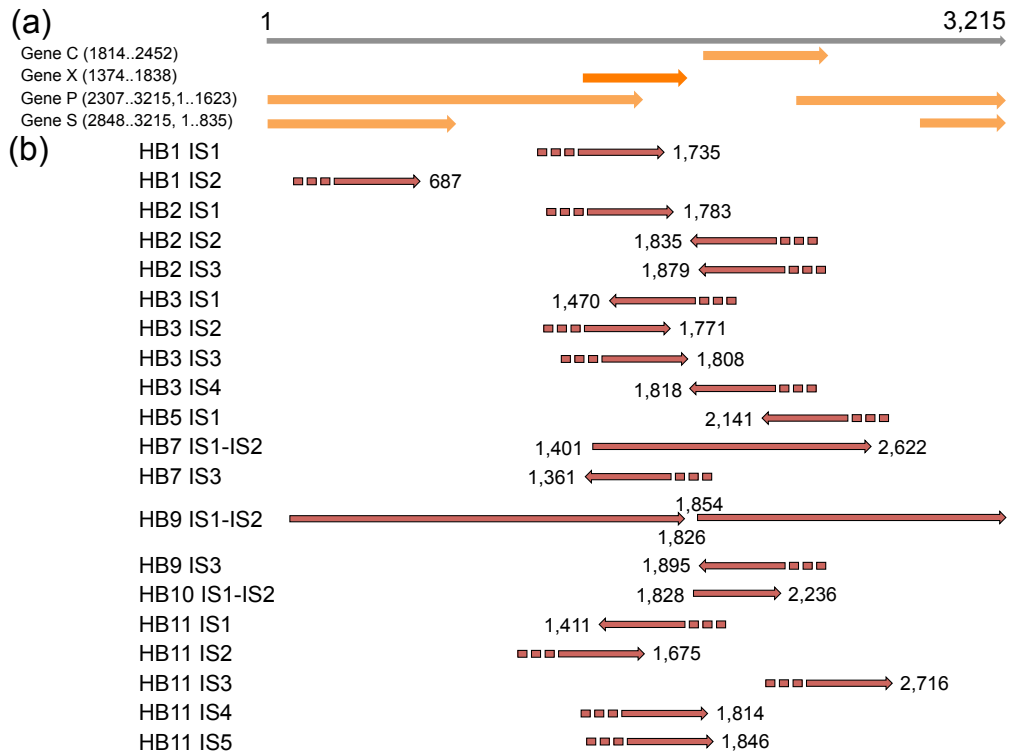

**Supplementary Figure 9:** Integration sites on HBV genome. **(a)** Structure of HBV genome. Arrows indicate gene structure. **(b)** Integration site on HBV genome. Arrows represents direction and location of integrated HBV genome. Integrated sequences were completely identified on HB9 IS1-IS2 and HB10 IS1-IS2. Integration site in host genome suggested that HB2 IS1 and IS2, and HB2 IS3 and IS4 are both ends of single integration events (**Supplementary Table 13**).



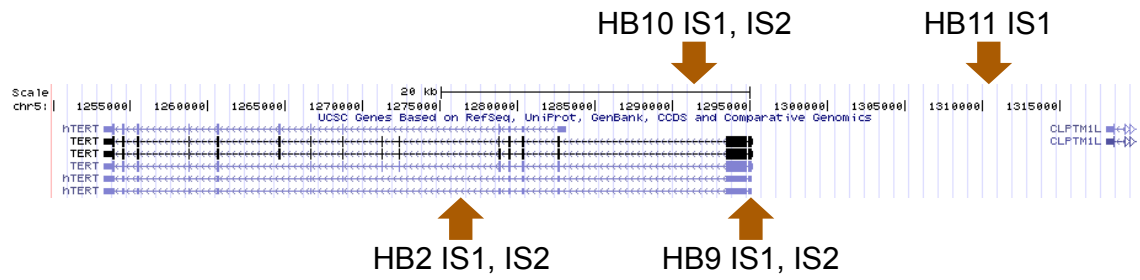

**Supplementary Figure 10:** HBV genome integration sites into the *TERT* locus. HBV genome integration was observed within or in the upstream region of the *TERT* gene in four HBV-related HCCs.

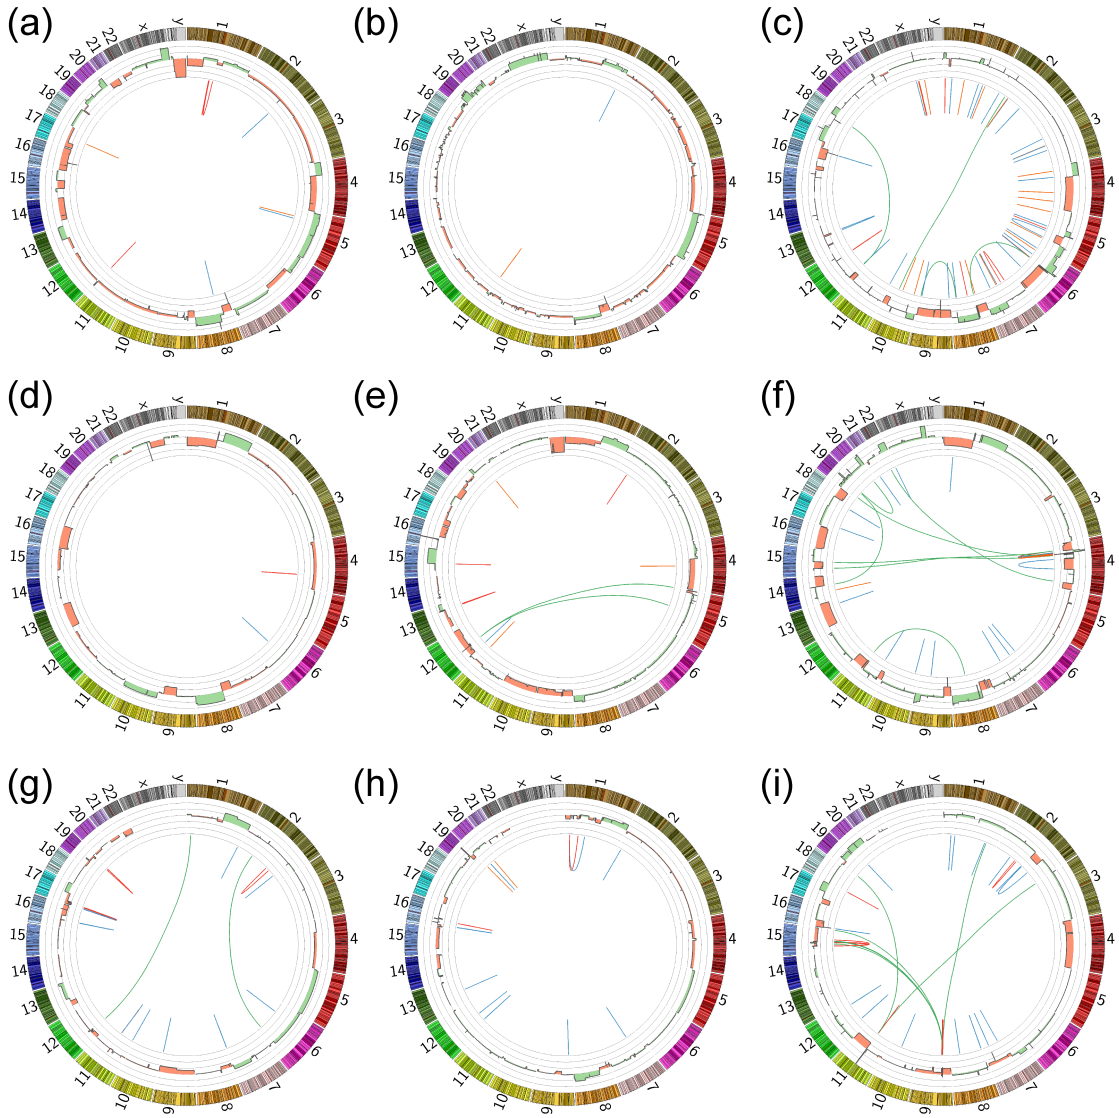

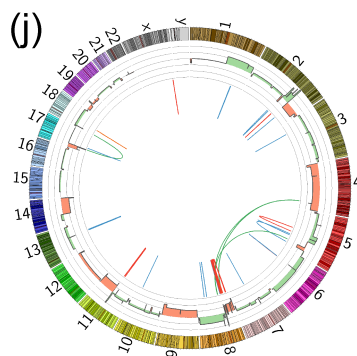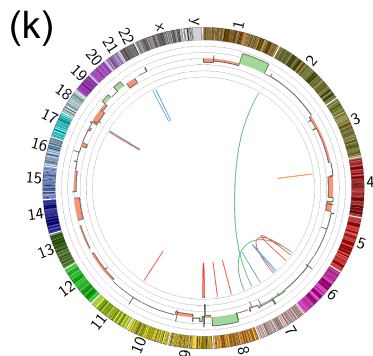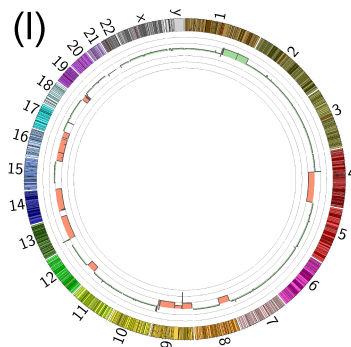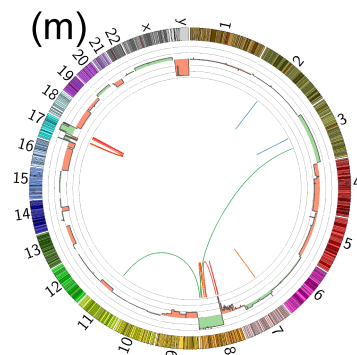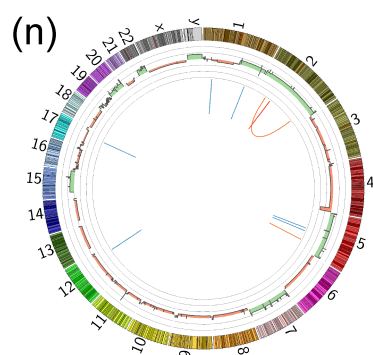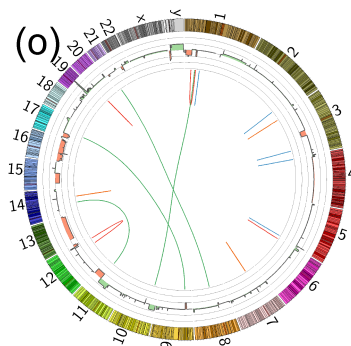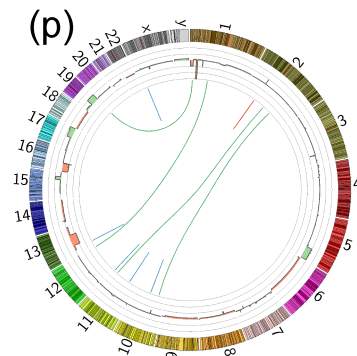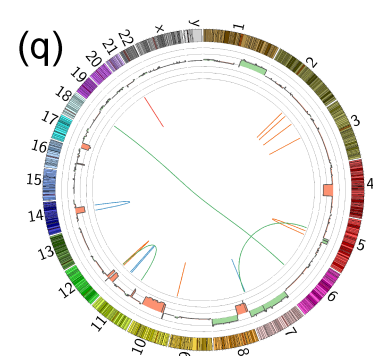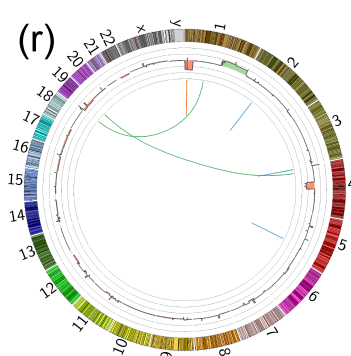

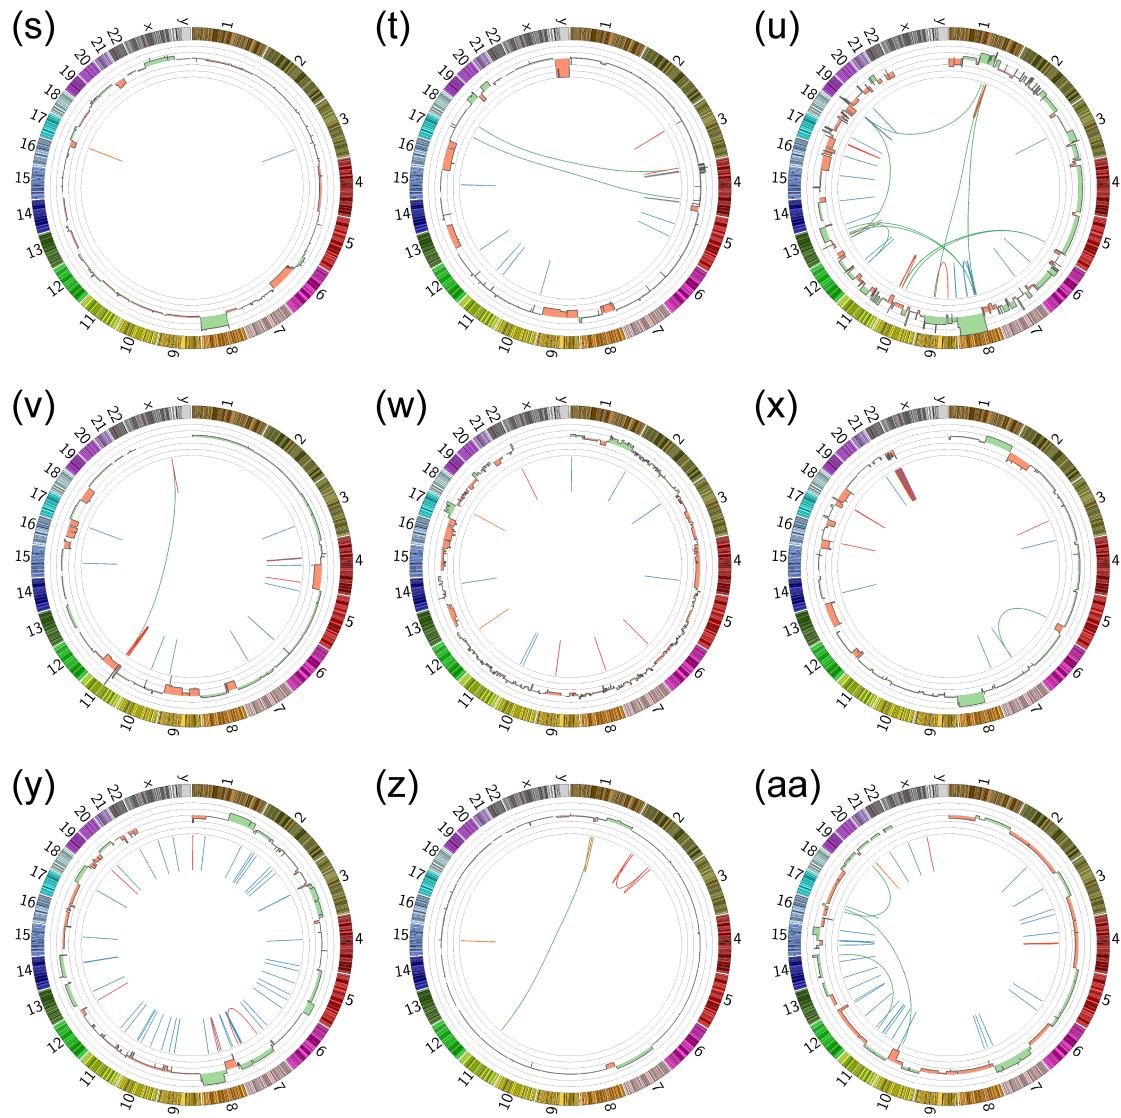

**Supplementary Figure 11:** Graphical representation of 27 HCC genomes. (a) HB1, (b) HB2, (c) HB3, (d) HB4, (e) HB5, (f) HB6, (g) HB7, (h) HB8, (i) HB9, (j) HB10, (k) HB11, (l) HC1, (m) HC2, (n) HC3-1, (o) HC3-2, (p) HC4, (q) HC5, (r) HC6, (s) HC7-1, (t) HC7-2, (u) HC8, (v) HC9, (w) HC10, (x) HC11, (y) HC12, (z) NBNC1, (aa) NBNC2. Each circle plot represents validated rearrangements (inner arcs), and copy number alternations (inner rings). In rearrangements, green, blue, orange and red lines show translocation, deletion, inversion and tandem duplication. Copy number gain and loss region were shown in green and red.

**Supplementary Table 1: Clinical and pathological features of 27 HCCs from 25 patients analyzed by whole genome sequencing**

| ID                 | Age | Gender | Hepatitis | Alcohol drinking | Tumor size (mm) | Pretreatment           | Edmondson grade <sup>d</sup> | Portal vein invasion |
|--------------------|-----|--------|-----------|------------------|-----------------|------------------------|------------------------------|----------------------|
| HB1                | 56  | M      | HBV       | +                | 33              | -                      | II                           | -                    |
| HB2                | 46  | M      | HBV       | -                | 24              | -                      | II                           | -                    |
| HB3                | 74  | M      | HBV       | +                | 60              | -                      | III                          | +                    |
| HB4                | 61  | M      | HBV       | -                | 30              | -                      | II-III                       | -                    |
| HB5                | 38  | M      | HBV       | +                | 18              | -                      | II-III                       | -                    |
| HB6                | 57  | M      | HBV       | +                | 30              | -                      | III                          | +                    |
| HB7                | 58  | M      | HBV       | +                | 22              | -                      | II                           | +                    |
| HB8                | 68  | F      | HBV       | +                | 45              | TACE <sup>b</sup>      | II-III                       | +                    |
| HB9                | 60  | M      | HBV       | -                | 80              | -                      | II-III                       | +                    |
| HB10               | 56  | M      | HBV       | +                | 63              | -                      | III                          | +                    |
| HB11               | 41  | F      | HBV       | +                | 30              | -                      | II-III                       | -                    |
| HC1                | 62  | M      | HCV       | -                | 87              | -                      | II-III                       | +                    |
| HC2                | 71  | M      | HCV       | -                | 45              | -                      | III                          | -                    |
| HC3-1 <sup>a</sup> | 69  | M      | HCV       | +                | 20              | -                      | II                           | -                    |
| HC3-2 <sup>a</sup> | 69  | M      | HCV       | +                | 20              | -                      | II                           | -                    |
| HC4                | 61  | M      | HCV       | +                | 18              | -                      | II                           | -                    |
| HC5                | 58  | M      | HCV       | +                | 24              | -                      | II                           | -                    |
| HC6                | 61  | M      | HCV       | +                | 35              | TACE                   | II                           | -                    |
| HC7-1 <sup>a</sup> | 64  | M      | HCV       | +                | 25              | -                      | II                           | -                    |
| HC7-2 <sup>a</sup> | 64  | M      | HCV       | +                | 25              | -                      | II                           | -                    |
| HC8                | 73  | F      | HCV       | -                | 21              | -                      | II                           | -                    |
| HC9                | 66  | M      | HCV       | -                | 40              | -                      | II-III                       | -                    |
| HC10               | 62  | F      | HCV       | -                | 20              | -                      | III                          | -                    |
| HC11               | 71  | F      | HCV       | -                | 35              | -                      | III                          | +                    |
| HC12               | 57  | M      | HCV       | +                | 43              | -                      | I                            | -                    |
| NBNC1              | 81  | F      | NBNC      | -                | 70              | TACE+PEIT <sup>c</sup> | II                           | -                    |
| NBNC2              | 73  | M      | NBNC      | +                | 60              | TACE                   | II                           | -                    |

**Supplementary Table 1 (continued)**

| ID                 | Hepatic vein invasion | Liver fibrosis <sup>e</sup> | Platelet count (x10 <sup>4</sup> )/mm <sup>2</sup> | Serum AFP level (ng/mL) | Other diseases         | Family history of cancer                                | Multiple liver nodules |
|--------------------|-----------------------|-----------------------------|----------------------------------------------------|-------------------------|------------------------|---------------------------------------------------------|------------------------|
| HB1                | -                     | 0                           | 19.0                                               | 106.8                   | -                      | mother:HCC                                              | -                      |
| HB2                | -                     | 4                           | 11.3                                               | 15.6                    | pancreatic tumor       | -                                                       | -                      |
| HB3                | +                     | 1                           | 16.6                                               | 99.9                    | esophageal cancer      | -                                                       | -                      |
| HB4                | +                     | 2                           | 28.3                                               | 382.4                   | -                      | -                                                       | -                      |
| HB5                | -                     | 3                           | 15.0                                               | 6.9                     | -                      | mother: breast cancer                                   | -                      |
| HB6                | -                     | 4                           | 8.9                                                | 2302.0                  | -                      | mother & brother: HCC                                   | -                      |
| HB7                | -                     | 3                           | 21.1                                               | 4.3                     | -                      | -                                                       | -                      |
| HB8                | -                     | 4                           | 6.1                                                | nd                      | -                      | -                                                       | -                      |
| HB9                | -                     | 2                           | 14.4                                               | 1630.3                  | -                      | -                                                       | -                      |
| HB10               | -                     | 3                           | 11.9                                               | 48.6                    | colon cancer           | -                                                       | -                      |
| HB11               | -                     | 4                           | 23.1                                               | 1678                    | -                      | mother:thyroid cancer, father: cancer of unknown origin | synchronous            |
| HC1                | +                     | 4                           | 12.4                                               | 1457.4                  | -                      | -                                                       | -                      |
| HC2                | -                     | 3                           | 11.3                                               | 27.7                    | -                      | -                                                       | -                      |
| HC3-1 <sup>a</sup> | -                     | 4                           | 14.4                                               | 7.0                     | -                      | -                                                       | synchronous            |
| HC3-2 <sup>a</sup> | -                     | 4                           | 14.4                                               | 7.0                     | -                      | -                                                       | synchronous            |
| HC4                | -                     | 2                           | 12.9                                               | <5                      | HCC                    | father: stomach cancer                                  | metachronous           |
| HC5                | -                     | 3                           | 15.3                                               | <5                      | -                      | -                                                       | -                      |
| HC6                | +                     | 4                           | 7.9                                                | <5                      | -                      | mother: HCC, father: lung cancer                        | -                      |
| HC7-1 <sup>a</sup> | -                     | 4                           | 22.6                                               | 3209.0                  | diabetes               | -                                                       | synchronous            |
| HC7-2 <sup>a</sup> | -                     | 4                           | 22.6                                               | 3209.0                  | diabetes               | -                                                       | synchronous            |
| HC8                | -                     | 4                           | 15.1                                               | 20                      | -                      | -                                                       | -                      |
| HC9                | -                     | 3                           | 13.2                                               | nd                      | -                      | -                                                       | -                      |
| HC10               | -                     | 4                           | 11.3                                               | 26.8                    | lung cancer            | -                                                       | metachronous           |
| HC11               | -                     | 2                           | 14.2                                               | nd                      | -                      | -                                                       | -                      |
| HC12               | -                     | 2                           | 22.7                                               | 5.2                     | diabetes               | -                                                       | -                      |
| NBNC1              | -                     | 4                           | 16.8                                               | 6.9                     | -                      | -                                                       | -                      |
| NBNC2              | -                     | 0                           | 14.3                                               | 96.2                    | diabetes, colon cancer | -                                                       | metachronous           |

a; Multicentric occurrence or intrahepatic metastasis was determined by considering their location, size, and histopathological features.

b; Transcatheter arterial chemoembolization. c; Percutaneous ethanol injection.

d; Edmondson tumor grading. e; Fibrosis in non-cancerous liver tissue is determined according to the New Inuyama Classification.

**Supplementary Table 2: Summary of somatic mutations in 27 HCC genomes**

| Sample  | Hepatitis | Point mutation |        |            |               |             | Somatic indel |              |             |
|---------|-----------|----------------|--------|------------|---------------|-------------|---------------|--------------|-------------|
|         |           | Total          | Coding | Synonymous | Nonsynonymous | Splice site | Total         | Coding indel | Splice site |
| HB1     | HBV       | 20,147         | 133    | 38         | 95            | 5           | 616           | 5            | 0           |
| HB2     | HBV       | 7,083          | 49     | 12         | 37            | 2           | 472           | 6            | 0           |
| HB3     | HBV       | 19,586         | 120    | 30         | 90            | 4           | 790           | 4            | 0           |
| HB4     | HBV       | 4,974          | 26     | 11         | 15            | 1           | 315           | 0            | 0           |
| HB5     | HBV       | 4,886          | 35     | 9          | 26            | 0           | 193           | 2            | 0           |
| HB6     | HBV       | 8,477          | 62     | 14         | 48            | 3           | 470           | 5            | 0           |
| HB7     | HBV       | 10,619         | 84     | 26         | 58            | 3           | 435           | 6            | 0           |
| HB8     | HBV       | 9,583          | 81     | 22         | 59            | 1           | 252           | 1            | 0           |
| HB9     | HBV       | 16,186         | 136    | 38         | 98            | 2           | 363           | 2            | 0           |
| HB10    | HBV       | 11,959         | 103    | 26         | 77            | 2           | 457           | 3            | 0           |
| HB11    | HBV       | 10,359         | 91     | 18         | 73            | 1           | 1,714         | 10           | 1           |
| HC1     | HCV       | 13,055         | 69     | 15         | 54            | 4           | 502           | 2            | 0           |
| HC2     | HCV       | 7,120          | 45     | 13         | 32            | 1           | 466           | 5            | 0           |
| HC3-1   | HCV       | 17,294         | 115    | 30         | 85            | 0           | 461           | 6            | 0           |
| HC3-2   | HCV       | 19,122         | 112    | 26         | 86            | 2           | 550           | 9            | 0           |
| HC4     | HCV       | 13,254         | 68     | 12         | 56            | 3           | 469           | 4            | 1           |
| HC5     | HCV       | 6,357          | 36     | 7          | 29            | 0           | 336           | 2            | 0           |
| HC6     | HCV       | 7,248          | 55     | 13         | 42            | 0           | 259           | 2            | 0           |
| HC7-1   | HCV       | 9,006          | 49     | 11         | 38            | 1           | 391           | 6            | 0           |
| HC7-2   | HCV       | 11,370         | 63     | 14         | 49            | 0           | 485           | 2            | 1           |
| HC8     | HCV       | 9,426          | 57     | 7          | 50            | 2           | 561           | 2            | 1           |
| HC9     | HCV       | 9,925          | 91     | 25         | 66            | 2           | 658           | 4            | 0           |
| HC10    | HCV       | 9,293          | 66     | 17         | 49            | 1           | 426           | 2            | 0           |
| HC11    | HCV       | 24,147         | 376    | 109        | 267           | 2           | 8,950         | 58           | 0           |
| HC12    | HCV       | 8,973          | 74     | 18         | 56            | 3           | 422           | 3            | 0           |
| NBNC1   | nBnC      | 6,464          | 25     | 5          | 20            | 0           | 430           | 2            | 0           |
| NBNC2   | nBnC      | 22,964         | 242    | 62         | 180           | 3           | 496           | 8            | 0           |
| Total   |           | 318,877        | 2,463  | 628        | 1,835         | 48          | 21,939        | 161          | 4           |
| Max     |           | 24,147         | 376    | 109        | 267           | 5           | 8,950         | 58           | 1           |
| Min     |           | 4,886          | 25     | 5          | 15            | 0           | 193           | 0            | 0           |
| Average |           | 11,810         | 91     | 23         | 68            | 2           | 813           | 6            | 0           |

**Supplementary Table 2 (continued)**

| Sample  | Hepatitis | Somatic rearrangement |          |           |                    |               |
|---------|-----------|-----------------------|----------|-----------|--------------------|---------------|
|         |           | Total                 | Deletion | Inversion | Tandem duplicaiton | Translocation |
| HB1     | HBV       | 8                     | 3        | 3         | 2                  | 0             |
| HB2     | HBV       | 2                     | 1        | 0         | 1                  | 0             |
| HB3     | HBV       | 59                    | 27       | 11        | 16                 | 5             |
| HB4     | HBV       | 2                     | 1        | 1         | 0                  | 0             |
| HB5     | HBV       | 9                     | 1        | 3         | 3                  | 2             |
| HB6     | HBV       | 25                    | 14       | 1         | 2                  | 8             |
| HB7     | HBV       | 21                    | 12       | 6         | 1                  | 2             |
| HB8     | HBV       | 15                    | 10       | 2         | 3                  | 0             |
| HB9     | HBV       | 40                    | 18       | 12        | 0                  | 10            |
| HB10    | HBV       | 48                    | 20       | 20        | 2                  | 6             |
| HB11    | HBV       | 22                    | 7        | 11        | 2                  | 2             |
| HC1     | HCV       | 0                     | 0        | 0         | 0                  | 0             |
| HC2     | HCV       | 16                    | 2        | 6         | 6                  | 2             |
| HC3-1   | HCV       | 9                     | 6        | 1         | 2                  | 0             |
| HC3-2   | HCV       | 19                    | 5        | 7         | 3                  | 4             |
| HC4     | HCV       | 10                    | 5        | 1         | 0                  | 4             |
| HC5     | HCV       | 15                    | 4        | 1         | 7                  | 3             |
| HC6     | HCV       | 7                     | 3        | 0         | 1                  | 3             |
| HC7-1   | HCV       | 2                     | 1        | 0         | 1                  | 0             |
| HC7-2   | HCV       | 22                    | 11       | 4         | 5                  | 2             |
| HC8     | HCV       | 41                    | 19       | 12        | 0                  | 10            |
| HC9     | HCV       | 23                    | 11       | 10        | 1                  | 1             |
| HC10    | HCV       | 15                    | 7        | 6         | 2                  | 0             |
| HC11    | HCV       | 40                    | 15       | 23        | 1                  | 1             |
| HC12    | HCV       | 50                    | 43       | 7         | 0                  | 0             |
| NBNC1   | nBnC      | 6                     | 0        | 3         | 2                  | 1             |
| NBNC2   | nBnC      | 35                    | 27       | 3         | 2                  | 3             |
| Total   |           | 561                   | 273      | 154       | 65                 | 69            |
| Max     |           | 59                    | 43       | 23        | 16                 | 10            |
| Min     |           | 0                     | 0        | 0         | 0                  | 0             |
| Average |           | 21                    | 10       | 6         | 2                  | 3             |







|                 |    |             |             |         |   |   |   |   |   |        |        |
|-----------------|----|-------------|-------------|---------|---|---|---|---|---|--------|--------|
| <i>DCC</i>      | 18 | 49,867,158  | 51,057,023  | 4,456   | 0 | 2 | 0 | 0 | 2 | 0.1734 | 0.2088 |
| <i>TRANK1</i>   | 3  | 36,869,766  | 36,986,300  | 8,866   | 0 | 2 | 0 | 0 | 2 | 0.1734 | 0.2088 |
| <i>BPTF</i>     | 17 | 65,821,841  | 65,978,404  | 8,828   | 1 | 1 | 0 | 0 | 2 | 0.1734 | 0.2088 |
| <i>MAP1B</i>    | 5  | 71,403,359  | 71,501,066  | 7,431   | 0 | 2 | 0 | 0 | 2 | 0.1948 | 0.2320 |
| <i>ITPR1</i>    | 3  | 4,558,176   | 4,887,909   | 8,464   | 0 | 2 | 0 | 0 | 2 | 0.1948 | 0.2320 |
| <i>NCKAP5</i>   | 2  | 133,430,862 | 134,275,097 | 5,798   | 0 | 2 | 0 | 0 | 2 | 0.2166 | 0.2564 |
| <i>AHNAK</i>    | 11 | 62,284,216  | 62,303,570  | 17,681  | 0 | 3 | 0 | 0 | 3 | 0.2192 | 0.2577 |
| <i>PREX2</i>    | 8  | 68,864,630  | 69,143,613  | 4,977   | 0 | 2 | 0 | 0 | 2 | 0.2202 | 0.2577 |
| <i>ODZ3</i>     | 4  | 183,245,174 | 183,721,504 | 8,204   | 0 | 2 | 0 | 0 | 2 | 0.2239 | 0.2605 |
| <i>PRUNE2</i>   | 9  | 79,229,486  | 79,520,879  | 9,339   | 1 | 1 | 0 | 0 | 2 | 0.2495 | 0.2888 |
| <i>C12orf51</i> | 12 | 112,600,191 | 112,757,291 | 13,033  | 1 | 1 | 0 | 0 | 2 | 0.2532 | 0.2914 |
| <i>DCHS1</i>    | 11 | 6,643,010   | 6,662,844   | 9,973   | 0 | 2 | 0 | 0 | 2 | 0.2569 | 0.2940 |
| <i>HERC1</i>    | 15 | 63,901,280  | 64,067,822  | 14,890  | 0 | 1 | 1 | 0 | 2 | 0.2606 | 0.2949 |
| <i>PCDH7</i>    | 4  | 30,723,045  | 31,144,471  | 3,752   | 0 | 2 | 0 | 0 | 2 | 0.2606 | 0.2949 |
| <i>RELN</i>     | 7  | 103,113,259 | 103,629,803 | 10,639  | 0 | 2 | 0 | 0 | 2 | 0.2716 | 0.3041 |
| <i>MLL</i>      | 11 | 118,307,228 | 118,392,887 | 12,050  | 1 | 1 | 0 | 0 | 2 | 0.2716 | 0.3041 |
| <i>TRRAP</i>    | 7  | 98,478,774  | 98,609,978  | 11,769  | 0 | 2 | 0 | 0 | 2 | 0.2936 | 0.3270 |
| <i>RNF213</i>   | 17 | 78,237,481  | 78,367,298  | 16,039  | 0 | 2 | 0 | 0 | 2 | 0.2973 | 0.3293 |
| <i>FAT4</i>     | 4  | 126,237,567 | 126,412,923 | 15,010  | 1 | 2 | 0 | 0 | 3 | 0.2990 | 0.3294 |
| <i>ABCA13</i>   | 7  | 48,211,081  | 48,685,108  | 15,421  | 0 | 3 | 0 | 0 | 3 | 0.3071 | 0.3365 |
| <i>LAMA2</i>    | 6  | 129,204,391 | 129,837,492 | 9,625   | 0 | 2 | 0 | 0 | 2 | 0.3338 | 0.3638 |
| <i>SPTA1</i>    | 1  | 158,581,054 | 158,656,307 | 7,464   | 0 | 1 | 1 | 0 | 2 | 0.3374 | 0.3658 |
| <i>DNAH6</i>    | 2  | 84,744,951  | 85,046,532  | 12,777  | 0 | 2 | 0 | 0 | 2 | 0.3589 | 0.3871 |
| <i>LRP2</i>     | 2  | 169,985,173 | 170,218,909 | 14,280  | 1 | 1 | 0 | 0 | 2 | 0.4012 | 0.4305 |
| <i>ANK3</i>     | 10 | 61,802,449  | 62,149,296  | 13,302  | 0 | 2 | 0 | 0 | 2 | 0.4422 | 0.4707 |
| <i>LRP1B</i>    | 2  | 140,990,755 | 142,888,298 | 14,160  | 0 | 3 | 0 | 0 | 3 | 0.4433 | 0.4707 |
| <i>CSMD1</i>    | 8  | 2,796,107   | 4,851,938   | 10,971  | 0 | 2 | 0 | 0 | 2 | 0.4488 | 0.4742 |
| <i>EYS</i>      | 6  | 64,430,492  | 66,205,303  | 9,591   | 1 | 1 | 0 | 0 | 2 | 0.4718 | 0.4959 |
| <i>FBN2</i>     | 5  | 127,595,147 | 127,873,296 | 8,995   | 0 | 2 | 0 | 0 | 2 | 0.4783 | 0.5001 |
| <i>MLL3</i>     | 7  | 151,833,917 | 152,132,871 | 14,968  | 0 | 2 | 0 | 0 | 2 | 0.5160 | 0.5369 |
| <i>USH2A</i>    | 1  | 215,799,123 | 216,595,678 | 15,889  | 0 | 2 | 0 | 0 | 2 | 0.5460 | 0.5652 |
| <i>DNAH7</i>    | 2  | 196,602,645 | 196,933,435 | 12,331  | 0 | 2 | 0 | 0 | 2 | 0.5747 | 0.5920 |
| <i>DYNC2H1</i>  | 11 | 102,980,304 | 103,349,981 | 13,301  | 0 | 2 | 0 | 0 | 2 | 0.5858 | 0.6004 |
| <i>CSMD3</i>    | 8  | 113,237,000 | 114,449,083 | 11,404  | 0 | 2 | 0 | 1 | 3 | 0.5967 | 0.6085 |
| <i>MUC16</i>    | 19 | 8,959,608   | 9,091,814   | 43,856  | 1 | 2 | 0 | 0 | 3 | 0.6641 | 0.6739 |
| <i>PCLO</i>     | 7  | 82,387,891  | 82,791,908  | 15,525  | 0 | 3 | 0 | 0 | 3 | 0.6773 | 0.6839 |
| <i>GPR98</i>    | 5  | 89,854,713  | 90,459,717  | 19,277  | 0 | 2 | 0 | 0 | 2 | 0.7307 | 0.7342 |
| <i>TTN</i>      | 2  | 179,391,739 | 179,669,369 | 101,512 | 0 | 4 | 1 | 0 | 5 | 0.9935 | 0.9935 |



**Supplementary Table 9: Gene set enrichment (GSE) analysis for genes with nonsense, coding indel and splice-site mutations**

| Category        | Term                                      | Count | %    | <i>P</i> -value | List Total | Pop Hits | Pop Total | Fold Enrichment | <i>q</i> -value |
|-----------------|-------------------------------------------|-------|------|-----------------|------------|----------|-----------|-----------------|-----------------|
| SP_PIR_KEYWORDS | phosphoprotein                            | 162   | 55.1 | 6.92E-10        | 292        | 7263     | 19235     | 1.469292662     | 0.00000023      |
| INTERPRO        | IPR013032:EGF-like region, conserved site | 19    | 6.5  | 8.02E-07        | 260        | 293      | 16659     | 4.154909425     | 0.00049         |
| INTERPRO        | IPR000742:EGF-like, type 3                | 15    | 5.1  | 2.14E-06        | 260        | 194      | 16659     | 4.954103886     | 0.0006          |
| INTERPRO        | IPR006210:EGF-like                        | 15    | 5.1  | 3.25E-06        | 260        | 201      | 16659     | 4.781572905     | 0.0007          |
| SP_PIR_KEYWORDS | egf-like domain                           | 15    | 5.1  | 1.15E-05        | 292        | 230      | 19235     | 4.296083979     | 0.0019          |
| UP_SEQ_FEATURE  | domain:EGF-like 1                         | 12    | 4.1  | 2.25E-06        | 292        | 120      | 19113     | 6.545547945     | 0.0039          |
| SMART           | SM00181:EGF                               | 15    | 5.1  | 3.00E-05        | 175        | 201      | 9079      | 3.871641791     | 0.0043          |
| SP_PIR_KEYWORDS | polymorphism                              | 208   | 70.7 | 4.75E-05        | 292        | 11550    | 19235     | 1.18628951      | 0.0052          |
| SP_PIR_KEYWORDS | calcium                                   | 28    | 9.5  | 9.42E-05        | 292        | 803      | 19235     | 2.2969515       | 0.0078          |
| UP_SEQ_FEATURE  | sequence variant                          | 218   | 74.1 | 1.06E-05        | 292        | 11992    | 19113     | 1.189901144     | 0.0092          |
| SP_PIR_KEYWORDS | <b>bromodomain</b>                        | 6     | 2.0  | 2.89E-04        | 292        | 39       | 19235     | 10.13435195     | 0.019           |
| SP_PIR_KEYWORDS | <b>chromatin regulator</b>                | 12    | 4.1  | 4.17E-04        | 292        | 213      | 19235     | 3.711171136     | 0.023           |
| INTERPRO        | IPR006209:EGF                             | 10    | 3.4  | 1.66E-04        | 260        | 127      | 16659     | 5.045124167     | 0.025           |
| SP_PIR_KEYWORDS | disease mutation                          | 42    | 14.3 | 5.45E-04        | 292        | 1591     | 19235     | 1.738955426     | 0.026           |
| INTERPRO        | <b>IPR001487:Bromodomain</b>              | 6     | 2.0  | 3.69E-04        | 260        | 40       | 16659     | 9.610961538     | 0.044           |
| SP_PIR_KEYWORDS | tumor suppressor                          | 9     | 3.1  | 0.001157126     | 292        | 137      | 19235     | 4.327442256     | 0.047           |

q-value was obtained by Benjamini and Hochberg's FDR method

Supplementary Table 10: Mutation list of the chromatin regulator genes

| Gene            | Sample           | Chr | Genomic position | Genotype | RNA_id    | Exon | aa position | Type          | Reference aa | Mutant aa |
|-----------------|------------------|-----|------------------|----------|-----------|------|-------------|---------------|--------------|-----------|
| <i>ARID1B</i>   | HB9              | 6   | 157,528,540      | CG       | NM_020732 | 20   | 2,089       | nonsynonymous | L            | V         |
| <i>ARID1B</i>   | HC5              | 6   | 157,454,194      | AG       | NM_020732 | 8    | 802         | nonsynonymous | M            | V         |
| <i>ARID1B</i>   | validation study | 6   | 157,099,508      | CG       | NM_020732 | 1    | 149         | nonsynonymous | Q            | E         |
| <i>ARID1B</i>   | validation study | 6   | 157,100,285      | CT       | NM_020732 | 1    | 408         | nonsynonymous | Q            | Stop      |
| <i>ARID1B</i>   | validation study | 6   | 157,099,981      | -GGC     | NM_020732 | 1    | 306         | coding indel  | -            | -         |
| <i>ARID1B</i>   | validation study | 6   | 157,100,046      | -AGC     | NM_020732 | 1    | 328         | coding indel  | -            | -         |
| <i>ARID1B</i>   | validation study | 6   | 157,100,137      | -G       | NM_020732 | 1    | 358         | coding indel  | -            | -         |
| <i>ARID1B</i>   | validation study | 6   | 157,100,222      | +C       | NM_020732 | 1    | 387         | coding indel  | -            | -         |
| <i>ARID1B</i>   | validation study | 6   | 157,100,309      | -C       | NM_020732 | 1    | 416         | coding indel  | -            | -         |
| <i>ARID1B</i>   | validation study | 6   | 157,505,455      | -T       | NM_020732 | 13   | 1,146       | coding indel  | -            | -         |
| <i>ARID2</i>    | HC9              | 12  | 46,244,449       | +T       | NM_152641 | 15   | 848         | coding indel  | -            | -         |
| <i>ARID2</i>    | HB3              | 12  | 46,243,834       | AC       | NM_152641 | 15   | 643         | nonsynonymous | S            | Stop      |
| <i>ARID2</i>    | validation study | 12  | 46,123,699       | AT       | NM_152641 | 1    | 27          | nonsynonymous | H            | L         |
| <i>ARID2</i>    | validation study | 12  | 46,231,200       | CG       | NM_152641 | 9    | 374         | nonsynonymous | G            | R         |
| <i>ARID2</i>    | validation study | 12  | 46,244,897       | GT       | NM_152641 | 15   | 997         | nonsynonymous | Q            | H         |
| <i>ARID2</i>    | validation study | 12  | 46,285,641       | GT       | NM_152641 | 17   | 1,667       | nonsynonymous | C            | W         |
| <i>ARID2</i>    | validation study | 12  | 46,123,699       | -C       | NM_152641 | 1    | 27          | coding indel  | -            | -         |
| <i>ARID2</i>    | validation study | 12  | 46,285,661       | -T       | NM_152641 | 17   | 1,674       | coding indel  | -            | -         |
| <i>ARID2</i>    | validation study | 12  | 46,298,726       | -A       | NM_152641 | 21   | 1,791       | coding indel  | -            | -         |
| <i>MLL</i>      | HC11             | 11  | 118,344,186      | -C       | NM_005933 | 3    | 771         | coding indel  | -            | -         |
| <i>MLL</i>      | HC7-2            | 11  | 118,342,410      | CG       | NM_005933 | 3    | 179         | nonsynonymous | P            | R         |
| <i>MLL</i>      | validation study | 11  | 118,307,445      | AG       | NM_005933 | 1    | 73          | nonsynonymous | G            | E         |
| <i>MLL</i>      | validation study | 11  | 118,352,504      | AG       | NM_005933 | 7    | 1,237       | nonsynonymous | V            | M         |
| <i>MLL3</i>     | HC3-1            | 7   | 151,853,128      | CT       | NM_170606 | 46   | 3,943       | nonsynonymous | G            | R         |
| <i>MLL3</i>     | HC4              | 7   | 151,859,936      | CT       | NM_170606 | 43   | 3,576       | nonsynonymous | I            | V         |
| <i>MLL3</i>     | validation study | 7   | 151,921,595      | CT       | NM_170606 | 19   | 1,028       | nonsynonymous | C            | Y         |
| <i>MLL3</i>     | validation study | 7   | 151,932,906      | CG       | NM_170606 | 16   | 922         | nonsynonymous | P            | R         |
| <i>MLL3</i>     | validation study | 7   | 151,932,946      | CT       | NM_170606 | 16   | 909         | nonsynonymous | R            | G         |
| <i>MLL3</i>     | validation study | 7   | 151,962,189      | AGT      | NM_170606 | 8    | 373         | nonsynonymous | I            | T, K      |
| <i>MLL3</i>     | validation study | 7   | 151,879,611      | -T       | NM_170606 | 36   | 1,778       | coding indel  | -            | -         |
| <i>BRD8</i>     | HB1              | 5   | 137,496,591      | AC       | NM_139199 | 18   | 806         | nonsynonymous | E            | Stop      |
| <i>BRD8</i>     | HB6              | 5   | 137,496,741      | CT       | NM_139199 | 18   | 756         | nonsynonymous | T            | A         |
| <i>BRD8</i>     | validation study | 5   | 137,497,513      | CT       | NM_139199 | 17   | 741         | nonsynonymous | A            | T         |
| <i>BPTF</i>     | HB10             | 17  | 65,907,062       | AG       | NM_004459 | 13   | 1,147       | nonsynonymous | D            | G         |
| <i>BPTF</i>     | HC3-1            | 17  | 65,871,775       | -C       | NM_004459 | 5    | 656         | coding indel  | -            | -         |
| <i>BPTF</i>     | validation study | 17  | 65,907,062       | AG       | NM_004459 | 13   | 1,147       | nonsynonymous | D            | G         |
| <i>BPTF</i>     | validation study | 17  | 65,919,058       | CT       | NM_004459 | 16   | 2,013       | nonsynonymous | V            | A         |
| <i>HIST1H4B</i> | HB11             | 6   | 26,027,251       | +A       | NM_003544 | 1    | 77          | coding indel  | -            | -         |
| <i>HIST1H4B</i> | HC4              | 6   | 26,027,170       | AT       | NM_003544 | 1    | 104         | nonsynonymous | Stop         | L         |
| <i>HIST1H4B</i> | validation study | 6   | 26,027,170       | AT       | NM_003544 | 1    | 104         | nonsynonymous | Stop         | K         |
| <i>BRE</i>      | HC11             | 2   | 28,248,273       | -A       | NM_004899 | 4    | 161         | coding indel  | -            | -         |
| <i>BRE</i>      | HC4              | 2   | 28,464,244       | CG       | NM_004899 | 8    | 279         | nonsynonymous | L            | V         |

**Supplementary Table 11: Association between mutations in chromatin regulators and clinical factors**

| data                                                                                                        | Tumor size | Edmondson grade | Portal vein invasion |
|-------------------------------------------------------------------------------------------------------------|------------|-----------------|----------------------|
| Point mutation and indel in the chromatin regulator genes                                                   | 0.67       | 0.75            | 1.00                 |
| Point mutation, indel and CNA in the chromatin regulator genes                                              | 0.78       | 0.62            | 1.00                 |
| Point mutation and indel in the <i>ARID</i> genes ( <i>ARID1A</i> , <i>ARID2</i> , and <i>ARID1B</i> )      | 0.56       | 0.94            | 0.36                 |
| Point mutation, indel and CNA in the <i>ARID</i> genes ( <i>ARID1A</i> , <i>ARID2</i> , and <i>ARID1B</i> ) | 0.80       | 0.83            | 0.38                 |
| Point mutation and indel in <i>ARID1A</i> gene                                                              | 0.44       | 0.20            | 0.59                 |
| Point mutation, indel and CNA in <i>ARID1A</i> gene                                                         | 0.39       | 0.67            | 0.36                 |

**Supplementary Table 11 (continued)**

| data                                                                                                        | Hepatic vein invasion | Liver fibrosis |
|-------------------------------------------------------------------------------------------------------------|-----------------------|----------------|
| Point mutation and indel in the chromatin regulator genes                                                   | 1.00                  | 0.061          |
| Point mutation, indel and CNA in the chromatin regulator genes                                              | 0.61                  | 0.026          |
| Point mutation and indel in the <i>ARID</i> genes ( <i>ARID1A</i> , <i>ARID2</i> , and <i>ARID1B</i> )      | 0.27                  | 0.16           |
| Point mutation, indel and CNA in the <i>ARID</i> genes ( <i>ARID1A</i> , <i>ARID2</i> , and <i>ARID1B</i> ) | 0.27                  | 0.0086         |
| Point mutation and indel in <i>ARID1A</i> gene                                                              | 0.39                  | 0.63           |
| Point mutation, indel and CNA in <i>ARID1A</i> gene                                                         | 0.042                 | 0.16           |

*P-values* for Tumor size, Edmondson grade, and Liver fibrosis were calculated by the Pearson's correlation test.

*P-values* for Portal vein invasion and Hepatic vein invasion were obtained by the Fisher's exact test.

**Supplementary Table 12: Recurrent somatic mutations of non-coding regions (n ≥ 3)**

| Symbol               | Type    | Chr | Start       | Last        | SNV | indel | Length (bp) | q-value     |
|----------------------|---------|-----|-------------|-------------|-----|-------|-------------|-------------|
| <i>ANKRD30BL</i>     | ncRNA   | 2   | 132,905,164 | 133,015,542 | 8   | 6     | 110,378     | 0           |
| <i>AF146191.4</i>    | lincRNA | 4   | 190,742,266 | 190,838,477 | 12  | 0     | 96,211      | 8.10463E-15 |
| <i>U2</i>            | snRNA   | 10  | 103,124,602 | 103,124,792 | 4   | 0     | 190         | 1.59648E-07 |
| <i>RP5-875O13.1</i>  | lincRNA | 1   | 16,860,381  | 16,862,144  | 3   | 3     | 1,763       | 1.69297E-07 |
| <i>AD000090.1</i>    | miRNA   | 19  | 36,066,627  | 36,066,721  | 3   | 0     | 94          | 2.41516E-06 |
| <i>AC020926.1</i>    | lincRNA | 16  | 20,685,853  | 20,693,496  | 6   | 0     | 7,643       | 7.84436E-06 |
| <i>HMHA1</i>         | UTR5    | 19  | 1,067,174   | 1,086,627   | 3   | 0     | 19,453      | 1.19856E-05 |
| <i>RNU2-2</i>        | snRNA   | 11  | 62,609,091  | 62,609,281  | 2   | 1     | 190         | 1.19856E-05 |
| <i>LOC100130581</i>  | PRO     | 17  | 41,447,213  | 41,466,266  | 2   | 2     | 19,053      | 3.12021E-05 |
| <i>CTBP2</i>         | UTR3    | 10  | 126,676,418 | 126,849,103 | 2   | 2     | 172,685     | 5.73097E-05 |
| <i>NEAT1</i>         | lincRNA | 11  | 65,190,269  | 65,213,011  | 9   | 0     | 22,742      | 9.66691E-05 |
| <i>ANKRD36BP2</i>    | lincRNA | 2   | 89,065,385  | 89,106,126  | 7   | 0     | 40,741      | 9.91213E-05 |
| <i>PRR15</i>         | UTR3    | 7   | 29,603,427  | 29,606,911  | 3   | 0     | 3,484       | 0.000193272 |
| <i>DKFZp434L192</i>  | PRO     | 7   | 56,563,916  | 56,564,977  | 4   | 0     | 1,061       | 0.000357403 |
| <b>PHF1</b>          | PRO     | 6   | 33,378,773  | 33,384,230  | 3   | 0     | 5,457       | 0.000391151 |
| <i>HLA-DRB5</i>      | PRO     | 6   | 32,485,154  | 32,498,006  | 4   | 0     | 12,852      | 0.000664692 |
| <b>MEDI</b>          | UTR3    | 17  | 37,560,538  | 37,607,527  | 4   | 0     | 46,989      | 0.000664692 |
| <i>AC079305.1</i>    | lincRNA | 2   | 178,107,103 | 178,111,509 | 2   | 2     | 4,406       | 0.000724295 |
| <i>PRSS3</i>         | PRO     | 9   | 33,795,559  | 33,799,229  | 3   | 0     | 3,670       | 0.000745744 |
| <i>CTD-2384A14.1</i> | lincRNA | 14  | 29,400,776  | 29,437,598  | 3   | 0     | 36,822      | 0.000745744 |
| <i>LOC100130581</i>  | ncRNA   | 17  | 41,453,296  | 41,466,266  | 3   | 1     | 12,970      | 0.000813248 |
| <i>CTB-113P19.1</i>  | lincRNA | 5   | 151,056,506 | 151,067,471 | 3   | 1     | 10,965      | 0.001123863 |
| <i>NIP7</i>          | UTR3    | 16  | 69,373,415  | 69,377,013  | 3   | 0     | 3,598       | 0.001307338 |
| <i>SMG1</i>          | UTR3    | 16  | 18,816,175  | 18,937,726  | 3   | 0     | 121,551     | 0.001768832 |
| <i>RIBC1</i>         | UTR5    | X   | 53,449,839  | 53,456,776  | 3   | 0     | 6,937       | 0.001768832 |
| <i>IL22RA2</i>       | UTR3    | 6   | 137,464,957 | 137,494,785 | 3   | 0     | 29,828      | 0.002785282 |
| <i>URB1</i>          | UTR3    | 21  | 33,683,330  | 33,765,312  | 3   | 1     | 81,982      | 0.003785807 |
| <i>SRSF3</i>         | UTR3    | 6   | 36,562,090  | 36,572,244  | 1   | 2     | 10,154      | 0.003791246 |
| <i>LOC150622</i>     | PRO     | 2   | 6,072,819   | 6,120,350   | 3   | 0     | 47,531      | 0.003791246 |
| <i>TRY6</i>          | PRO     | 7   | 142,478,757 | 142,482,399 | 3   | 0     | 3,642       | 0.006317702 |
| <i>LOC121952</i>     | ncRNA   | 13  | 103,532,449 | 103,548,383 | 3   | 0     | 15,934      | 0.006317702 |
| <i>HCG22</i>         | lincRNA | 6   | 31,021,984  | 31,027,653  | 2   | 2     | 5,669       | 0.006388021 |
| <i>PIK3R3</i>        | UTR3    | 1   | 46,505,812  | 46,598,380  | 3   | 0     | 92,568      | 0.007245836 |
| <i>KIAA1430</i>      | UTR3    | 4   | 186,080,819 | 186,125,182 | 3   | 0     | 44,363      | 0.007507514 |
| <i>PTAR1</i>         | UTR3    | 9   | 72,324,438  | 72,374,876  | 5   | 0     | 50,438      | 0.007507514 |
| <i>LOC220980</i>     | lincRNA | 10  | 45,306,472  | 45,455,137  | 3   | 0     | 148,665     | 0.007994232 |
| <i>SCD</i>           | UTR3    | 10  | 102,106,772 | 102,124,588 | 3   | 0     | 17,816      | 0.009002124 |
| <i>SMAD6</i>         | ncRNA   | 15  | 66,994,674  | 67,074,337  | 3   | 0     | 79,663      | 0.009002124 |
| <i>SRSF3</i>         | ncRNA   | 6   | 36,562,090  | 36,572,244  | 1   | 2     | 10,154      | 0.009522649 |
| <i>PRPF40A</i>       | UTR3    | 2   | 153,508,107 | 153,573,975 | 4   | 0     | 65,868      | 0.009808589 |
| <i>MAG13</i>         | UTR3    | 1   | 113,933,475 | 114,228,545 | 2   | 1     | 295,070     | 0.009808589 |
| <i>RP11-622O11.2</i> | lincRNA | 8   | 126,953,373 | 126,963,433 | 3   | 0     | 10,060      | 0.011986707 |
| <i>FLJ39653</i>      | lincRNA | 4   | 16,228,286  | 16,259,810  | 3   | 0     | 31,524      | 0.012564096 |
| <i>NFIA</i>          | UTR3    | 1   | 61,547,980  | 61,928,460  | 4   | 0     | 380,480     | 0.017052264 |
| <i>EDNRB</i>         | UTR3    | 13  | 78,469,616  | 78,492,966  | 3   | 0     | 23,350      | 0.017648691 |
| <i>AP000459.4</i>    | lincRNA | 21  | 24,733,426  | 24,757,182  | 3   | 0     | 23,756      | 0.018307238 |
| <i>HCG2P7</i>        | ncRNA   | 6   | 29,866,808  | 29,870,431  | 3   | 0     | 3,623       | 0.01897249  |
| <i>AC011477.2</i>    | lincRNA | 19  | 19,945,686  | 20,008,579  | 3   | 0     | 62,893      | 0.019644199 |
| <i>CSGALNACT1</i>    | ncRNA   | 8   | 19,261,672  | 19,540,261  | 3   | 0     | 278,589     | 0.021434704 |
| <i>ATXN7L3B</i>      | UTR3    | 12  | 74,931,551  | 74,935,232  | 3   | 0     | 3,681       | 0.024476649 |
| <i>PTGER3</i>        | UTR3    | 1   | 71,471,537  | 71,513,491  | 4   | 0     | 41,954      | 0.028065538 |
| <i>AFF4</i>          | UTR3    | 5   | 132,211,071 | 132,299,354 | 3   | 0     | 88,283      | 0.029118099 |
| <i>RORA</i>          | UTR3    | 15  | 60,780,483  | 60,884,707  | 3   | 1     | 104,224     | 0.029118099 |
| <i>MYEF2</i>         | UTR3    | 15  | 48,431,629  | 48,470,558  | 3   | 0     | 38,929      | 0.029118099 |
| <i>FAM126B</i>       | UTR3    | 2   | 201,838,441 | 201,936,392 | 3   | 0     | 97,951      | 0.029384429 |
| <i>RLIM</i>          | UTR3    | X   | 73,802,811  | 73,834,461  | 3   | 0     | 31,650      | 0.032953863 |
| <i>ADCY2</i>         | UTR3    | 5   | 7,396,343   | 7,830,194   | 3   | 0     | 433,851     | 0.032953863 |
| <i>KLF6</i>          | ncRNA   | 10  | 3,818,188   | 3,827,473   | 3   | 0     | 9,285       | 0.032953863 |
| <i>ZC3H6</i>         | UTR3    | 2   | 113,033,178 | 113,097,640 | 2   | 1     | 64,462      | 0.03371726  |

|                   |         |    |             |             |   |   |         |             |
|-------------------|---------|----|-------------|-------------|---|---|---------|-------------|
| <i>LOC400940</i>  | ncRNA   | 2  | 6,122,110   | 6,128,364   | 3 | 0 | 6,254   | 0.045347117 |
| <i>AP000476.1</i> | lincRNA | 21 | 25,801,054  | 25,862,621  | 3 | 0 | 61,567  | 0.045347117 |
| <i>PAM</i>        | ncRNA   | 5  | 102,201,527 | 102,366,808 | 3 | 0 | 165,281 | 0.046140706 |

---

UTR3; 3'UTR, UTR5; 5'UTR, PRO; promoter

**Supplementary Table 13: HBV integration sites (IS) identified in HBV-related HCC genomes**

| Sample | Candidate name | Chr1 | Pos1  | Chr2 | Pos2        | Number of support read-pair | Affected gene                   |
|--------|----------------|------|-------|------|-------------|-----------------------------|---------------------------------|
| HB1    | IS1            | HBV  | 1,735 | 5    | 88,432,442  | 14                          |                                 |
|        | IS2            | HBV  | 687   | 5    | 88,754,909  | 18                          |                                 |
| HB2    | IS1            | HBV  | 1,783 | 5    | 1,275,381   | 3                           | <i>TERT</i>                     |
|        | IS2            | HBV  | 1,835 | 5    | 1,275,390   | 8                           | <i>TERT</i>                     |
|        | IS3            | HBV  | 1,879 | 5    | 173,125,603 | 9                           |                                 |
| HB3    | IS1            | HBV  | 1,470 | 6    | 68,664,024  | 11                          |                                 |
|        | IS2            | HBV  | 1,771 | 8    | 39,200,450  | 14                          | <i>ADAM5P</i>                   |
|        | IS3            | HBV  | 1,808 | 4    | 79,048,012  | 19                          | <i>FRAS1</i>                    |
|        | IS4            | HBV  | 1,818 | 4    | 79,048,008  | 15                          | <i>FRAS1</i>                    |
| HB4    | -              | -    | -     | -    | -           | -                           |                                 |
| HB5    | IS1            | HBV  | 2,141 | 3    | 24,499,331  | 11                          | <i>THRB</i>                     |
| HB6    | -              | -    | -     | -    | -           | -                           |                                 |
| HB7    | IS1            | HBV  | 1,401 | 7    | 52,802,419  | 11                          |                                 |
|        | IS2            | HBV  | 2,622 | 7    | 52,802,387  | 5                           |                                 |
|        | IS3            | HBV  | 1,361 | 3    | 121,439,129 | 3                           | <i>HNFI1A</i>                   |
| HB8    | -              | -    | -     | -    | -           | -                           |                                 |
| HB9    | IS1            | HBV  | 1,854 | 5    | 1,295,172   | 26                          | <i>TERT</i>                     |
|        | IS2            | HBV  | 1,726 | 5    | 1,295,200   | 13                          | <i>TERT</i>                     |
|        | IS3            | HBV  | 1,895 | 7    | 70,267,023  | 4                           |                                 |
| HB10   | IS1            | HBV  | 1,828 | 5    | 1,293,404   | 37                          | <i>TERT</i>                     |
|        | IS2            | HBV  | 2,236 | 5    | 1,293,416   | 25                          | <i>TERT</i>                     |
| HB11   | IS1            | HBV  | 1,411 | 5    | 1,310,429   | 74                          | <i>TERT-CLPTMIL<sup>a</sup></i> |
|        | IS2            | HBV  | 1,675 | 17   | 15,412,626  | 34                          | <i>FAM18B2</i>                  |
|        | IS3            | HBV  | 2,716 | 20   | 30,502,092  | 18                          | <i>TLL9</i>                     |
|        | IS4            | HBV  | 1,814 | 9    | 24,396,870  | 14                          |                                 |
|        | IS5            | HBV  | 1,846 | 4    | 151,954,261 | 4                           |                                 |

Integration site was not identified in HB4, HB6, and HB8.

a; Intergenic region between *TERT* and *CLPTMIL*



**Supplementary Table 14: Association between etiological factors and mutation pattern**

| Data set                                                | Distance between MC tumors <sup>j</sup> | HBV vs. HCV vs. NBNC | Liver fibrosis | Alcohol drinking | Edmondson grade <sup>k</sup> | Age    |
|---------------------------------------------------------|-----------------------------------------|----------------------|----------------|------------------|------------------------------|--------|
| Point mutation (6 category) <sup>a</sup>                | 0.0073                                  | 0.3812               | 0.9328         | 0.0051           | 0.5866                       | 0.7804 |
| Point mutation <sup>b</sup>                             | 0.0005                                  | 0.0909               | 0.5716         | 0.0283           | 0.5324                       | 0.2423 |
| Point mutation+indel <sup>c</sup>                       | 0.0008                                  | 0.0685               | 0.5252         | 0.0408           | 0.4137                       | 0.2375 |
| Point mutation+indel+Rearrangement <sup>d</sup>         | 0.0001                                  | 0.0682               | 0.3835         | 0.0128           | 0.4149                       | 0.2716 |
| Point mutation+indel length <sup>e</sup>                | 0.0003                                  | 0.1147               | 0.4427         | 0.0049           | 0.6310                       | 0.4401 |
| Point mutation+indel length+Rearrangement <sup>f</sup>  | 0.0002                                  | 0.1891               | 0.5016         | 0.0055           | 0.8440                       | 0.6076 |
| Point mutation+indel length+ns_rate <sup>g</sup>        | 0.0006                                  | 0.0216               | 0.2497         | 0.0256           | 0.5051                       | 0.2610 |
| Point mutation+indel+Rearrangement+ns_rate <sup>h</sup> | 0.0003                                  | 0.0146               | 0.2151         | 0.0892           | 0.3218                       | 0.2058 |
| Point mutation+total_num <sup>i</sup>                   | 0.0006                                  | 0.0877               | 0.1529         | 0.0398           | 0.5388                       | 0.2494 |

**Supplementary Table 14 (continued)**

| Data set                                                | Tumor size | Platelet count (x10 <sup>4</sup> )/mm <sup>2</sup> | Portal vein invasion | Hepatic vein invasion | Serum AFP level <sup>l</sup> | Multiple liver nodules |
|---------------------------------------------------------|------------|----------------------------------------------------|----------------------|-----------------------|------------------------------|------------------------|
| Point mutation (6 category) <sup>a</sup>                | 0.0411     | 0.3601                                             | 0.5337               | 0.8128                | 0.0681                       | 0.0118                 |
| Point mutation <sup>b</sup>                             | 0.0784     | 0.5838                                             | 0.2971               | 0.8416                | 0.1420                       | 0.0161                 |
| Point mutation+indel <sup>c</sup>                       | 0.1066     | 0.7748                                             | 0.4683               | 0.8277                | 0.2155                       | 0.0168                 |
| Point mutation+indel+Rearrangement <sup>d</sup>         | 0.0939     | 0.7317                                             | 0.3926               | 0.8394                | 0.2707                       | 0.0135                 |
| Point mutation+indel length <sup>e</sup>                | 0.1029     | 0.6230                                             | 0.3990               | 0.7856                | 0.2601                       | 0.0173                 |
| Point mutation+indel length+Rearrangement <sup>f</sup>  | 0.0810     | 0.6289                                             | 0.4068               | 0.7854                | 0.2805                       | 0.0204                 |
| Point mutation+indel length+ns_rate <sup>g</sup>        | 0.2538     | 0.4773                                             | 0.4026               | 0.6012                | 0.1704                       | 0.0186                 |
| Point mutation+indel+Rearrangement+ns_rate <sup>h</sup> | 0.1576     | 0.8231                                             | 0.4465               | 0.7129                | 0.2054                       | 0.0108                 |
| Point mutation+total_num <sup>i</sup>                   | 0.0475     | 0.7064                                             | 0.1603               | 0.8449                | 0.4671                       | 0.0119                 |

a; number of substitutions without considering CpG. b; number of substitutions with CpG. c; number of substitutions and indels. d; number of substitutions, indels and rearrangements.

e; number of substitutions and length distribution of indels (number of 1bp, 2bp, 3bp, 5bp and >=5bp indels). f; number of substitutions, length distribution of indels and rearrangements.

g; number of substitution, length distribution of indels and the ratio of number of nonsynonymous to that of coding mutations.

h; number of substitution, indel, rearrangement and the ratio of number of nonsynonymous to that of coding mutations.

i; number of substitutions with CpG and total number of point mutations. j; Distance between MC tumors are tested by permutation test.

k; Edmondson tumor grading. l; Samples were classified into two groups with AFP level (>10ng/mL or not).
